# Supplementary material
Source: PubMed Central journal article supplement (PMC3125485)
Supplement: NIHMS275089-supplement-01.pdf [file NIHMS275089-supplement-01.pdf]

Supplemental Information

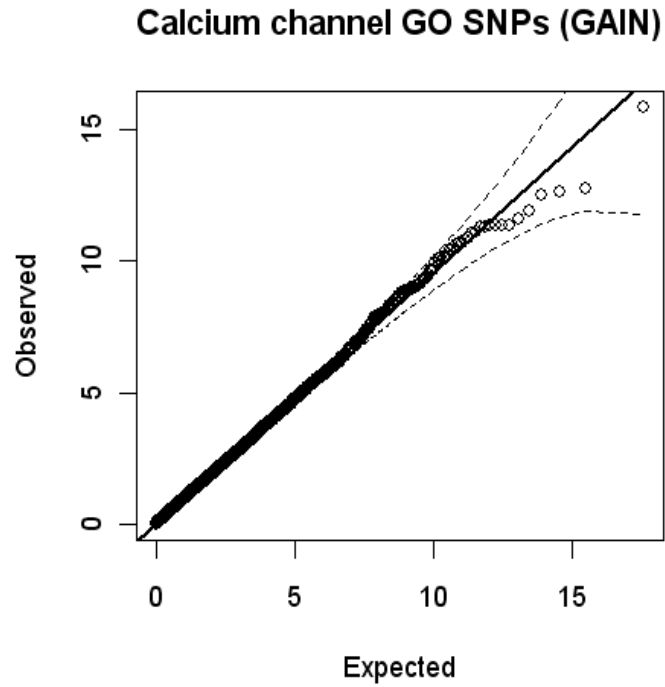

**Figure S1.** QQ-plot of the results of interaction analysis of SNPs in genes encoding dihydropyridine-sensitive calcium channel subunits (no LD pruning) in the GAIN data.

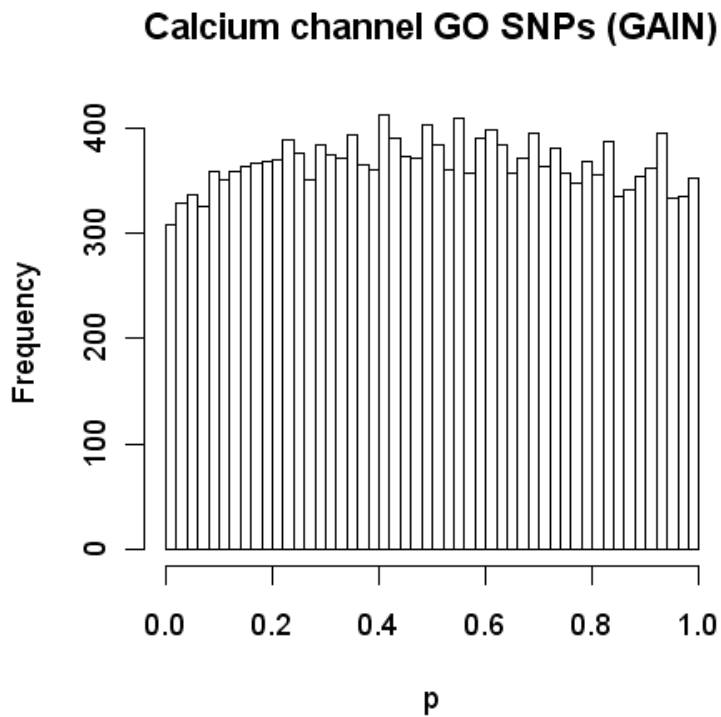

**Figure S2.** Histogram of p-values of interaction analysis of SNPs in genes encoding dihydropyridine-sensitive calcium channel subunits (no LD pruning) in the GAIN data.

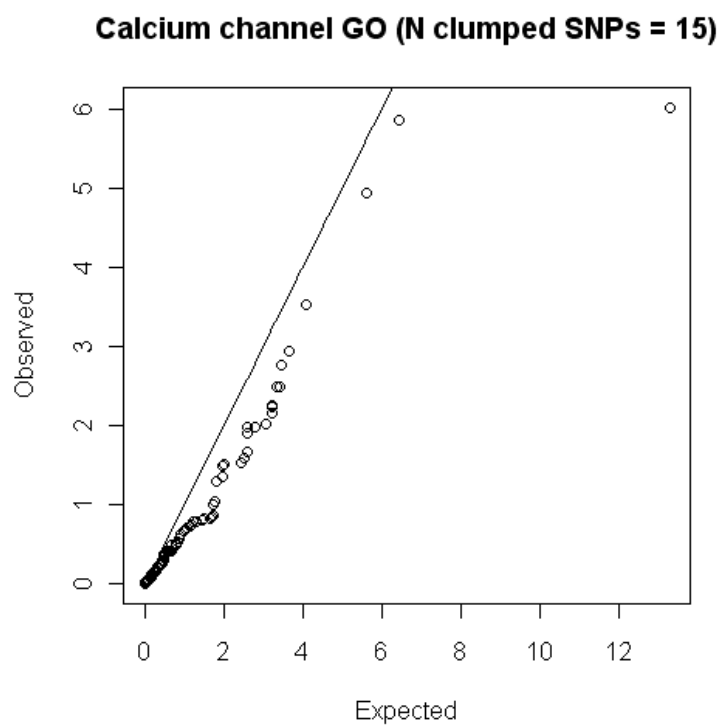

**Figure S3.** QQ-plot of the results of interaction analysis of top significant ( $p \leq 0.05$ ) SNPs and non-independent SNPs at  $r^2 \geq 0.5$  removed in genes encoding dihydropyridine-sensitive calcium channel subunits in the WTCCC data.

**Table S1.** The top significant ( $p \leq 0.01$ ) interactions based upon SNPs with single locus  $p \leq 0.001$  in the WTCCC data and the corresponding interaction p-values in the GAIN data.

| chr1 | snp1       | chr2 | snp2       | p_WTCCC  | p_GAIN   |
|------|------------|------|------------|----------|----------|
| 1    | rs215773   | 18   | rs614841   | 3.04E-05 | 0.343008 |
| 6    | rs6912394  | 22   | rs688034   | 3.12E-05 | 0.673303 |
| 7    | rs941034   | 11   | rs1431571  | 3.63E-05 | 0.668061 |
| 6    | rs9346240  | 10   | rs10905203 | 3.81E-05 | 0.758046 |
| 5    | rs255375   | 14   | rs8008996  | 7.51E-05 | 0.213787 |
| 9    | rs10980405 | 14   | rs964431   | 7.88E-05 | NA       |
| 9    | rs10989064 | 14   | rs12434721 | 7.94E-05 | 0.888099 |
| 10   | rs1540956  | 15   | rs901130   | 8.78E-05 | 0.101233 |
| 2    | rs1375144  | 5    | rs1862618  | 9.73E-05 | 0.476320 |
| 14   | rs2354445  | 20   | rs6031991  | 1.41E-04 | 0.128686 |
| 1    | rs12125340 | 7    | rs2402752  | 1.42E-04 | 0.969594 |
| 6    | rs700496   | 19   | rs2061332  | 1.87E-04 | 0.980713 |
| 6    | rs572550   | 8    | rs12056374 | 1.90E-04 | 0.183530 |
| 8    | rs7016497  | 14   | rs11626813 | 1.96E-04 | 0.089796 |
| 3    | rs11130858 | 8    | rs16919670 | 2.28E-04 | 0.782740 |
| 4    | rs958927   | 8    | rs6472997  | 2.33E-04 | NA       |
| 8    | rs481061   | 11   | rs1431571  | 2.61E-04 | NA       |
| 5    | rs32784    | 10   | rs2096285  | 2.85E-04 | 0.937338 |
| 3    | rs150219   | 19   | rs10409187 | 2.87E-04 | NA       |
| 2    | rs2953174  | 3    | rs4134190  | 3.04E-04 | NA       |
| 5    | rs1862618  | 15   | rs17599989 | 3.06E-04 | 0.566277 |
| 2    | rs2592941  | 15   | rs999742   | 3.13E-04 | 0.731574 |
| 5    | rs10041283 | 5    | rs10060800 | 3.26E-04 | 0.772288 |
| 11   | rs10893668 | 12   | rs7959282  | 3.30E-04 | 0.908842 |
| 1    | rs11207909 | 9    | rs11138278 | 3.71E-04 | 0.884301 |
| 5    | rs6861906  | 7    | rs2402752  | 4.20E-04 | 0.643029 |
| 5    | rs5009031  | 18   | rs8096537  | 4.38E-04 | 0.515946 |
| 3    | rs2033701  | 9    | rs10982256 | 4.45E-04 | 0.700024 |
| 10   | rs3121466  | 17   | rs2017854  | 5.01E-04 | 0.490939 |
| 7    | rs2774960  | 22   | rs11089599 | 5.36E-04 | 0.489291 |
| 4    | rs10025322 | 12   | rs1245652  | 5.60E-04 | 0.778738 |
| 4    | rs10025322 | 19   | rs7247513  | 5.82E-04 | 0.930697 |
| 4    | rs6856121  | 7    | rs2718038  | 5.90E-04 | 0.414292 |
| 12   | rs10848636 | 14   | rs2293732  | 5.92E-04 | 0.143330 |
| 18   | rs11877435 | 19   | rs7247513  | 6.33E-04 | 0.408502 |
| 2    | rs12611712 | 10   | rs1892302  | 6.51E-04 | 0.311335 |
| 1    | rs17163470 | 14   | rs964431   | 6.59E-04 | NA       |
| 1    | rs17163470 | 10   | rs1540956  | 7.17E-04 | 0.922152 |
| 21   | rs417836   | 22   | rs130707   | 7.77E-04 | NA       |
| 3    | rs7624830  | 5    | rs1862618  | 8.08E-04 | 0.387524 |
| 6    | rs501241   | 10   | rs10905715 | 8.20E-04 | NA       |

|    |            |    |            |          |          |
|----|------------|----|------------|----------|----------|
| 7  | rs941034   | 7  | rs17314507 | 8.21E-04 | 0.609785 |
| 14 | rs17108400 | 19 | rs759071   | 8.22E-04 | 0.845526 |
| 3  | rs6439389  | 16 | rs1344484  | 8.40E-04 | 0.976485 |
| 2  | rs12611712 | 2  | rs10928826 | 8.63E-04 | 0.828202 |
| 7  | rs2355066  | 11 | rs1431571  | 8.68E-04 | 0.601370 |
| 3  | rs150219   | 14 | rs8008996  | 8.81E-04 | 0.883260 |
| 12 | rs11168839 | 15 | rs901130   | 8.82E-04 | NA       |
| 12 | rs7959282  | 16 | rs4784508  | 9.04E-04 | 0.186208 |
| 1  | rs4920516  | 11 | rs10431079 | 9.08E-04 | 0.610139 |
| 5  | rs411172   | 15 | rs12595660 | 9.30E-04 | 0.925766 |
| 1  | rs396954   | 1  | rs12145699 | 9.43E-04 | NA       |
| 6  | rs1029123  | 10 | rs3121466  | 9.99E-04 | 0.562953 |
| 2  | rs4234123  | 4  | rs7691186  | 1.01E-03 | NA       |
| 9  | rs901992   | 11 | rs2201845  | 1.02E-03 | 0.387768 |
| 5  | rs411172   | 11 | rs10742161 | 1.03E-03 | 0.527188 |
| 14 | rs11626813 | 22 | rs11089599 | 1.08E-03 | 0.256379 |
| 2  | rs4234123  | 3  | rs4134190  | 1.08E-03 | NA       |
| 1  | rs3896178  | 2  | rs7577619  | 1.09E-03 | 0.341321 |
| 8  | rs481061   | 14 | rs10431700 | 1.11E-03 | NA       |
| 7  | rs2402752  | 14 | rs8011085  | 1.11E-03 | 0.215066 |
| 3  | rs6762678  | 14 | rs8011085  | 1.15E-03 | 0.953376 |
| 1  | rs1748035  | 10 | rs788261   | 1.23E-03 | 0.435788 |
| 1  | rs17163470 | 8  | rs16919670 | 1.23E-03 | 0.787575 |
| 11 | rs2155777  | 15 | rs901130   | 1.25E-03 | 0.111778 |
| 11 | rs10893668 | 11 | rs11223704 | 1.25E-03 | 0.349528 |
| 3  | rs150219   | 20 | rs6031991  | 1.29E-03 | 0.153090 |
| 12 | rs7975892  | 15 | rs4076907  | 1.29E-03 | NA       |
| 10 | rs6602256  | 14 | rs7159947  | 1.32E-03 | 0.333647 |
| 2  | rs17248501 | 15 | rs12595660 | 1.35E-03 | 0.919747 |
| 12 | rs7959282  | 14 | rs6571488  | 1.41E-03 | 0.662264 |
| 5  | rs2589653  | 10 | rs12356059 | 1.42E-03 | NA       |
| 2  | rs7562696  | 5  | rs32784    | 1.43E-03 | 0.722220 |
| 4  | rs1472962  | 8  | rs10097578 | 1.47E-03 | 0.490166 |
| 8  | rs1993980  | 9  | rs1573257  | 1.52E-03 | NA       |
| 18 | rs7240747  | 18 | rs1893146  | 1.53E-03 | 0.771247 |
| 11 | rs10742161 | 12 | rs1245652  | 1.56E-03 | 0.791460 |
| 2  | rs3754895  | 10 | rs788261   | 1.58E-03 | 0.614431 |
| 3  | rs6443856  | 4  | rs6850978  | 1.58E-03 | 0.515344 |
| 3  | rs6439389  | 13 | rs1540460  | 1.60E-03 | 0.255831 |
| 2  | rs2576742  | 9  | rs4879540  | 1.62E-03 | NA       |
| 3  | rs4627791  | 3  | rs7624830  | 1.64E-03 | 0.601189 |
| 5  | rs10060800 | 22 | rs688034   | 1.64E-03 | 0.552364 |
| 6  | rs13196792 | 11 | rs2201845  | 1.65E-03 | 0.674229 |
| 13 | rs1149839  | 19 | rs12610472 | 1.80E-03 | 0.388513 |

|    |            |    |            |          |          |
|----|------------|----|------------|----------|----------|
| 5  | rs255375   | 13 | rs179356   | 1.80E-03 | 0.454469 |
| 2  | rs2292388  | 18 | rs7239844  | 1.86E-03 | NA       |
| 5  | rs10060800 | 10 | rs1892302  | 1.88E-03 | 0.913075 |
| 2  | rs11686149 | 4  | rs11098416 | 1.89E-03 | 0.501282 |
| 4  | rs10025322 | 15 | rs999742   | 1.90E-03 | 0.655362 |
| 4  | rs2055942  | 14 | rs17197037 | 1.92E-03 | 0.910478 |
| 14 | rs964431   | 22 | rs17435801 | 1.93E-03 | NA       |
| 1  | rs4657976  | 10 | rs7896131  | 1.93E-03 | 0.888456 |
| 2  | rs4641882  | 10 | rs10994548 | 1.94E-03 | 0.488134 |
| 8  | rs10097578 | 15 | rs12591922 | 1.99E-03 | 0.240523 |
| 2  | rs2576742  | 9  | rs7860900  | 2.00E-03 | NA       |
| 5  | rs999580   | 15 | rs4076907  | 2.00E-03 | NA       |
| 2  | rs3754895  | 15 | rs4420487  | 2.03E-03 | 0.290189 |
| 1  | rs7534239  | 6  | rs852928   | 2.03E-03 | 0.927071 |
| 2  | rs4027132  | 8  | rs1993980  | 2.04E-03 | NA       |
| 6  | rs954753   | 8  | rs9643449  | 2.08E-03 | 0.997949 |
| 4  | rs1472962  | 8  | rs12056374 | 2.09E-03 | 0.805131 |
| 15 | rs17599989 | 19 | rs10853835 | 2.10E-03 | NA       |
| 10 | rs2096285  | 11 | rs10431079 | 2.12E-03 | 0.680905 |
| 4  | rs2055392  | 16 | rs3935873  | 2.12E-03 | 0.933405 |
| 7  | rs2774960  | 11 | rs10790633 | 2.13E-03 | 0.902150 |
| 2  | rs2592941  | 5  | rs10041283 | 2.15E-03 | 0.158793 |
| 2  | rs737565   | 3  | rs4134190  | 2.16E-03 | 0.216608 |
| 9  | rs888230   | 10 | rs10905715 | 2.20E-03 | NA       |
| 7  | rs11768025 | 9  | rs10989064 | 2.26E-03 | 0.037826 |
| 11 | rs2283238  | 17 | rs203076   | 2.27E-03 | 0.536993 |
| 8  | rs6472997  | 22 | rs165650   | 2.28E-03 | NA       |
| 4  | rs12640371 | 19 | rs7248493  | 2.29E-03 | NA       |
| 6  | rs7763010  | 10 | rs2890337  | 2.34E-03 | 0.348018 |
| 13 | rs7333011  | 18 | rs9947947  | 2.35E-03 | 0.930225 |
| 6  | rs1029123  | 12 | rs11168839 | 2.35E-03 | NA       |
| 4  | rs6856121  | 11 | rs4372426  | 2.35E-03 | NA       |
| 5  | rs999580   | 6  | rs1352976  | 2.36E-03 | NA       |
| 8  | rs2953932  | 16 | rs4782872  | 2.38E-03 | 0.896298 |
| 7  | rs2355066  | 20 | rs3761218  | 2.40E-03 | 0.116887 |
| 2  | rs3754895  | 4  | rs11098416 | 2.41E-03 | 0.506399 |
| 3  | rs7630226  | 14 | rs12434721 | 2.46E-03 | 0.637006 |
| 8  | rs12056374 | 21 | rs2834929  | 2.47E-03 | 0.467794 |
| 9  | rs7860900  | 9  | rs17499507 | 2.54E-03 | NA       |
| 3  | rs6439389  | 11 | rs10893668 | 2.59E-03 | 0.248048 |
| 1  | rs12130132 | 10 | rs10905203 | 2.61E-03 | NA       |
| 7  | rs2526100  | 22 | rs11089599 | 2.61E-03 | 0.144381 |
| 8  | rs10111407 | 11 | rs356242   | 2.61E-03 | 0.479595 |
| 11 | rs4372426  | 21 | rs2834929  | 2.62E-03 | NA       |

|    |            |    |            |          |          |
|----|------------|----|------------|----------|----------|
| 7  | rs11976431 | 12 | rs11067270 | 2.62E-03 | 0.492555 |
| 1  | rs7519141  | 9  | rs12380216 | 2.67E-03 | 0.225365 |
| 7  | rs1558043  | 9  | rs10993698 | 2.67E-03 | NA       |
| 3  | rs6443856  | 10 | rs10905715 | 2.67E-03 | NA       |
| 3  | rs4858594  | 12 | rs1245652  | 2.67E-03 | 0.943962 |
| 2  | rs6750543  | 3  | rs7624830  | 2.69E-03 | 0.481196 |
| 3  | rs6783478  | 14 | rs6571488  | 2.69E-03 | NA       |
| 11 | rs4945441  | 14 | rs8011085  | 2.72E-03 | 0.218421 |
| 2  | rs4852549  | 5  | rs4400148  | 2.75E-03 | 0.781115 |
| 5  | rs5009031  | 5  | rs1862618  | 2.76E-03 | 0.155441 |
| 7  | rs1635079  | 19 | rs2191566  | 2.79E-03 | 0.285922 |
| 4  | rs6850978  | 9  | rs1573257  | 2.79E-03 | 0.571977 |
| 7  | rs12537100 | 19 | rs2191566  | 2.87E-03 | 0.990186 |
| 2  | rs7562696  | 11 | rs10790633 | 2.91E-03 | 0.567741 |
| 1  | rs3896178  | 22 | rs12157657 | 2.93E-03 | 0.599233 |
| 1  | rs6679942  | 7  | rs11768025 | 2.97E-03 | 0.161148 |
| 7  | rs2285757  | 18 | rs7239844  | 2.99E-03 | NA       |
| 12 | rs11044100 | 18 | rs9947947  | 3.01E-03 | 0.602911 |
| 5  | rs1211159  | 9  | rs10982256 | 3.02E-03 | 0.249558 |
| 5  | rs10060800 | 15 | rs7163502  | 3.05E-03 | NA       |
| 13 | rs1149839  | 20 | rs6031991  | 3.06E-03 | 0.585586 |
| 14 | rs8008996  | 19 | rs12610472 | 3.06E-03 | 0.091784 |
| 9  | rs7860900  | 18 | rs7240747  | 3.06E-03 | NA       |
| 2  | rs10182324 | 14 | rs10438244 | 3.09E-03 | 0.402113 |
| 4  | rs11098416 | 13 | rs12584910 | 3.09E-03 | 0.018896 |
| 8  | rs10111407 | 8  | rs3019878  | 3.10E-03 | 0.261076 |
| 3  | rs4627791  | 3  | rs6439389  | 3.11E-03 | 0.831075 |
| 1  | rs12125340 | 11 | rs2514890  | 3.15E-03 | 0.616061 |
| 2  | rs11687654 | 21 | rs2830549  | 3.18E-03 | NA       |
| 7  | rs2355066  | 7  | rs17314507 | 3.19E-03 | 0.841449 |
| 13 | rs1540460  | 18 | rs9947947  | 3.20E-03 | 0.066404 |
| 1  | rs4845390  | 2  | rs2292388  | 3.21E-03 | 0.109512 |
| 2  | rs4849413  | 5  | rs27000    | 3.22E-03 | 0.866607 |
| 4  | rs17147420 | 8  | rs10111407 | 3.22E-03 | 0.615068 |
| 11 | rs4938280  | 14 | rs10438244 | 3.24E-03 | 0.652334 |
| 1  | rs2213736  | 9  | rs10989064 | 3.24E-03 | 0.234894 |
| 1  | rs6679942  | 5  | rs6596595  | 3.28E-03 | NA       |
| 7  | rs2718038  | 17 | rs203076   | 3.29E-03 | 0.710260 |
| 12 | rs10848636 | 16 | rs8060756  | 3.32E-03 | 0.202492 |
| 2  | rs4852549  | 6  | rs6912394  | 3.32E-03 | 0.260319 |
| 3  | rs934841   | 15 | rs4076907  | 3.33E-03 | 0.619994 |
| 7  | rs7794215  | 17 | rs2017854  | 3.35E-03 | 0.061910 |
| 2  | rs12611712 | 15 | rs12591922 | 3.35E-03 | 0.916974 |
| 10 | rs7899892  | 15 | rs4076907  | 3.36E-03 | 0.482952 |

|    |            |    |            |          |          |
|----|------------|----|------------|----------|----------|
| 4  | rs965253   | 6  | rs2252933  | 3.36E-03 | 0.835693 |
| 3  | rs2240920  | 3  | rs4134190  | 3.38E-03 | 0.890889 |
| 4  | rs17147420 | 10 | rs4601676  | 3.41E-03 | 0.343080 |
| 3  | rs1541855  | 10 | rs1892302  | 3.42E-03 | 0.843090 |
| 18 | rs7240747  | 21 | rs2154490  | 3.43E-03 | 0.526519 |
| 1  | rs6604643  | 4  | rs6819526  | 3.44E-03 | 0.009304 |
| 2  | rs11686149 | 9  | rs1573257  | 3.45E-03 | 0.164347 |
| 1  | rs1748035  | 8  | rs2953932  | 3.45E-03 | 0.046893 |
| 5  | rs1428006  | 8  | rs4288339  | 3.48E-03 | NA       |
| 18 | rs7239844  | 19 | rs1048123  | 3.49E-03 | NA       |
| 6  | rs9370893  | 15 | rs4420487  | 3.50E-03 | 0.094108 |
| 6  | rs1029123  | 7  | rs2774960  | 3.62E-03 | 0.163202 |
| 2  | rs3754895  | 8  | rs11787515 | 3.66E-03 | 0.049747 |
| 2  | rs4280420  | 10 | rs788261   | 3.70E-03 | 0.667626 |
| 3  | rs33528    | 20 | rs1885290  | 3.71E-03 | 0.385231 |
| 5  | rs6861906  | 10 | rs2890337  | 3.72E-03 | 0.762504 |
| 6  | rs1006997  | 12 | rs10848636 | 3.72E-03 | 0.306017 |
| 8  | rs10111407 | 11 | rs4945441  | 3.74E-03 | 0.916491 |
| 3  | rs4134190  | 11 | rs1431571  | 3.75E-03 | 0.880869 |
| 7  | rs1558043  | 17 | rs2108978  | 3.75E-03 | 0.226382 |
| 1  | rs6679942  | 19 | rs10853835 | 3.78E-03 | NA       |
| 4  | rs6856121  | 10 | rs10764062 | 3.79E-03 | 0.718716 |
| 5  | rs6596595  | 19 | rs7248493  | 3.80E-03 | NA       |
| 1  | rs396954   | 14 | rs12434721 | 3.81E-03 | 0.515076 |
| 10 | rs788261   | 14 | rs10431700 | 3.85E-03 | 0.731266 |
| 7  | rs12537100 | 19 | rs2061332  | 3.86E-03 | 0.387918 |
| 11 | rs10790633 | 12 | rs11044100 | 3.88E-03 | 0.343259 |
| 10 | rs10905715 | 18 | rs7240747  | 3.88E-03 | NA       |
| 2  | rs10187657 | 16 | rs8060756  | 3.89E-03 | 0.924151 |
| 2  | rs2292388  | 10 | rs10905203 | 3.90E-03 | 0.742761 |
| 2  | rs4849413  | 5  | rs1862618  | 3.91E-03 | 0.823280 |
| 18 | rs11877435 | 19 | rs1216119  | 3.93E-03 | 0.049164 |
| 1  | rs6604643  | 7  | rs2526100  | 3.95E-03 | 0.459076 |
| 3  | rs4134190  | 16 | rs420259   | 3.96E-03 | 0.830008 |
| 2  | rs3754895  | 8  | rs731589   | 3.98E-03 | 0.591625 |
| 2  | rs2576742  | 3  | rs6439389  | 3.99E-03 | 0.166631 |
| 9  | rs17499507 | 10 | rs788261   | 4.01E-03 | 0.085681 |
| 7  | rs12537100 | 19 | rs12610472 | 4.02E-03 | 0.880087 |
| 11 | rs7932890  | 19 | rs10407941 | 4.04E-03 | 0.126677 |
| 6  | rs686786   | 9  | rs10812869 | 4.04E-03 | 0.751613 |
| 5  | rs255375   | 13 | rs4550321  | 4.04E-03 | 0.229692 |
| 4  | rs6856121  | 17 | rs2017854  | 4.11E-03 | 0.757011 |
| 6  | rs572550   | 16 | rs12149894 | 4.15E-03 | 0.039070 |
| 1  | rs12130132 | 20 | rs6031991  | 4.15E-03 | NA       |

|    |            |    |            |          |          |
|----|------------|----|------------|----------|----------|
| 3  | rs4627791  | 10 | rs7896131  | 4.15E-03 | 0.334364 |
| 5  | rs4400148  | 21 | rs2830549  | 4.15E-03 | NA       |
| 14 | rs12434721 | 18 | rs1893146  | 4.16E-03 | 0.685200 |
| 7  | rs2774960  | 9  | rs10989064 | 4.23E-03 | 0.074060 |
| 21 | rs2154490  | 21 | rs2834929  | 4.25E-03 | 0.273071 |
| 12 | rs7959282  | 20 | rs6031991  | 4.25E-03 | 0.337609 |
| 7  | rs1558043  | 8  | rs10097578 | 4.26E-03 | 0.733622 |
| 4  | rs958927   | 21 | rs2154490  | 4.29E-03 | 0.899448 |
| 3  | rs7649424  | 4  | rs6820236  | 4.31E-03 | 0.633369 |
| 8  | rs4288339  | 17 | rs2017854  | 4.39E-03 | 0.837089 |
| 4  | rs4956324  | 19 | rs7408169  | 4.40E-03 | NA       |
| 3  | rs6783478  | 13 | rs7333011  | 4.40E-03 | NA       |
| 1  | rs12130132 | 15 | rs4076907  | 4.40E-03 | NA       |
| 1  | rs285482   | 17 | rs203076   | 4.46E-03 | 0.137098 |
| 6  | rs9295140  | 16 | rs8060756  | 4.47E-03 | 0.224612 |
| 17 | rs4924803  | 21 | rs2830549  | 4.50E-03 | NA       |
| 6  | rs1171115  | 6  | rs2763025  | 4.51E-03 | 0.416681 |
| 1  | rs2989476  | 6  | rs13196792 | 4.53E-03 | 0.829500 |
| 1  | rs4845390  | 5  | rs32784    | 4.54E-03 | 0.208514 |
| 4  | rs958927   | 8  | rs1545453  | 4.56E-03 | 0.260161 |
| 3  | rs2900668  | 9  | rs12380216 | 4.60E-03 | 0.573956 |
| 7  | rs17314507 | 10 | rs10994548 | 4.63E-03 | 0.246508 |
| 1  | rs17163470 | 19 | rs7248493  | 4.65E-03 | 0.429778 |
| 10 | rs10905203 | 14 | rs7159947  | 4.66E-03 | 0.450943 |
| 2  | rs6750543  | 3  | rs4134190  | 4.66E-03 | 0.411182 |
| 15 | rs12595660 | 18 | rs9947947  | 4.70E-03 | 0.583899 |
| 10 | rs10994548 | 12 | rs7975892  | 4.72E-03 | NA       |
| 8  | rs1993980  | 21 | rs2834929  | 4.73E-03 | NA       |
| 4  | rs2055942  | 19 | rs7408169  | 4.77E-03 | NA       |
| 2  | rs4673905  | 15 | rs901130   | 4.82E-03 | 0.677271 |
| 4  | rs965253   | 6  | rs9346240  | 4.82E-03 | 0.673133 |
| 7  | rs2526100  | 8  | rs10504768 | 4.85E-03 | 0.640961 |
| 4  | rs17147420 | 5  | rs1428006  | 4.85E-03 | NA       |
| 3  | rs6443856  | 19 | rs12610472 | 4.86E-03 | 0.665970 |
| 11 | rs2155777  | 19 | rs10409187 | 4.87E-03 | NA       |
| 8  | rs3019878  | 22 | rs130707   | 4.87E-03 | 0.928609 |
| 5  | rs10041283 | 7  | rs2285757  | 4.87E-03 | 0.011013 |
| 6  | rs1006997  | 12 | rs7975892  | 4.87E-03 | NA       |
| 9  | rs1573257  | 11 | rs7932890  | 4.95E-03 | 0.603354 |
| 6  | rs13196792 | 10 | rs1491192  | 4.98E-03 | 0.609655 |
| 3  | rs6783478  | 10 | rs7896131  | 5.08E-03 | NA       |
| 1  | rs926576   | 7  | rs1558043  | 5.09E-03 | 0.325097 |
| 7  | rs1558043  | 14 | rs8011085  | 5.09E-03 | 0.524316 |
| 7  | rs2526100  | 11 | rs1431571  | 5.11E-03 | 0.483440 |



|    |            |    |            |          |          |
|----|------------|----|------------|----------|----------|
| 4  | rs2055392  | 9  | rs7860900  | 5.11E-03 | NA       |
| 18 | rs8096537  | 19 | rs1216119  | 5.12E-03 | 0.822661 |
| 15 | rs999742   | 19 | rs759071   | 5.13E-03 | 0.551641 |
| 5  | rs1490796  | 14 | rs964431   | 5.23E-03 | NA       |
| 2  | rs10928826 | 19 | rs7408169  | 5.23E-03 | NA       |
| 1  | rs17163470 | 21 | rs2834929  | 5.25E-03 | 0.812148 |
| 5  | rs411172   | 12 | rs7975892  | 5.26E-03 | NA       |
| 1  | rs2213736  | 12 | rs1245652  | 5.28E-03 | 0.217165 |
| 1  | rs6679942  | 14 | rs12434721 | 5.31E-03 | 0.979706 |
| 9  | rs7872727  | 19 | rs759071   | 5.32E-03 | 0.997334 |
| 6  | rs6906574  | 19 | rs11672395 | 5.33E-03 | 0.243103 |
| 4  | rs6856121  | 5  | rs255375   | 5.39E-03 | 0.352402 |
| 1  | rs926576   | 11 | rs7932890  | 5.41E-03 | 0.723678 |
| 2  | rs737565   | 12 | rs7959282  | 5.41E-03 | 0.464351 |
| 10 | rs10826258 | 18 | rs1893146  | 5.43E-03 | 0.481808 |
| 1  | rs926576   | 4  | rs17147420 | 5.44E-03 | 0.489753 |
| 7  | rs2402752  | 8  | rs731589   | 5.46E-03 | 0.413082 |
| 11 | rs10898976 | 13 | rs4550321  | 5.47E-03 | NA       |
| 1  | rs736861   | 3  | rs9850123  | 5.47E-03 | 0.557778 |
| 14 | rs6571488  | 22 | rs12157657 | 5.48E-03 | 0.444055 |
| 2  | rs4641882  | 9  | rs11138278 | 5.48E-03 | 0.019090 |
| 11 | rs4938280  | 19 | rs10409187 | 5.53E-03 | NA       |
| 6  | rs572550   | 17 | rs2017854  | 5.53E-03 | 0.099107 |
| 8  | rs481061   | 14 | rs8011085  | 5.54E-03 | NA       |
| 1  | rs4628571  | 11 | rs7932890  | 5.54E-03 | 0.079849 |
| 1  | rs2989476  | 10 | rs10905715 | 5.55E-03 | NA       |
| 8  | rs1545453  | 21 | rs12482209 | 5.62E-03 | 0.101494 |
| 10 | rs7899892  | 18 | rs7240747  | 5.65E-03 | 0.694986 |
| 10 | rs1892302  | 19 | rs2191566  | 5.66E-03 | 0.241509 |
| 1  | rs7534239  | 2  | rs10187657 | 5.68E-03 | 0.064129 |
| 1  | rs6679942  | 2  | rs9309401  | 5.70E-03 | 0.186257 |
| 4  | rs12640371 | 6  | rs1029123  | 5.70E-03 | NA       |
| 12 | rs10848636 | 14 | rs8019107  | 5.72E-03 | 0.732805 |
| 13 | rs4550321  | 15 | rs4076907  | 5.74E-03 | 0.707714 |
| 1  | rs12125340 | 6  | rs9295140  | 5.77E-03 | 0.632749 |
| 2  | rs4027132  | 5  | rs27000    | 5.81E-03 | 0.545091 |
| 1  | rs215773   | 5  | rs4400148  | 5.82E-03 | 0.838206 |
| 6  | rs1029123  | 9  | rs7872727  | 5.83E-03 | 0.368682 |
| 2  | rs4234123  | 6  | rs686786   | 5.85E-03 | NA       |
| 11 | rs4922556  | 12 | rs11044100 | 5.85E-03 | 0.854300 |
| 2  | rs2576742  | 2  | rs4849413  | 5.85E-03 | 0.767517 |
| 15 | rs7163502  | 19 | rs7248493  | 5.88E-03 | NA       |
| 11 | rs2201845  | 19 | rs7247513  | 5.91E-03 | 0.154656 |
| 3  | rs6439389  | 10 | rs10905203 | 5.94E-03 | 0.530220 |

|    |            |    |            |          |          |
|----|------------|----|------------|----------|----------|
| 5  | rs411172   | 10 | rs10994548 | 5.95E-03 | 0.746162 |
| 1  | rs6604643  | 2  | rs4280420  | 5.97E-03 | 0.190198 |
| 3  | rs7624830  | 4  | rs6850978  | 5.98E-03 | 0.202477 |
| 3  | rs33528    | 12 | rs10848636 | 6.00E-03 | 0.500826 |
| 1  | rs736861   | 2  | rs17248501 | 6.06E-03 | 0.594800 |
| 8  | rs3019878  | 15 | rs999742   | 6.07E-03 | 0.496771 |
| 9  | rs888230   | 20 | rs1885290  | 6.08E-03 | 0.082871 |
| 1  | rs6691577  | 8  | rs731589   | 6.12E-03 | 0.866605 |
| 6  | rs954753   | 14 | rs10438244 | 6.12E-03 | 0.147341 |
| 7  | rs2355066  | 15 | rs17841201 | 6.13E-03 | 0.198778 |
| 2  | rs4280420  | 9  | rs10982256 | 6.13E-03 | 0.817475 |
| 20 | rs3761218  | 21 | rs2823032  | 6.15E-03 | 0.034319 |
| 4  | rs7691186  | 11 | rs356242   | 6.15E-03 | 0.889618 |
| 4  | rs965253   | 13 | rs4550321  | 6.16E-03 | 0.672794 |
| 6  | rs686786   | 22 | rs688034   | 6.19E-03 | 0.124059 |
| 7  | rs2402752  | 21 | rs2830549  | 6.19E-03 | NA       |
| 5  | rs5009031  | 7  | rs2526100  | 6.20E-03 | 0.319981 |
| 3  | rs6762678  | 11 | rs10742161 | 6.22E-03 | 0.710901 |
| 3  | rs906482   | 12 | rs10848636 | 6.23E-03 | 0.258635 |
| 3  | rs6762678  | 10 | rs17537423 | 6.26E-03 | 0.624590 |
| 2  | rs4027132  | 6  | rs7763010  | 6.27E-03 | 0.843613 |
| 6  | rs13196792 | 11 | rs4922556  | 6.29E-03 | 0.913442 |
| 1  | rs4628571  | 14 | rs10431700 | 6.30E-03 | 0.481599 |
| 5  | rs5009031  | 10 | rs10764062 | 6.36E-03 | 0.798944 |
| 14 | rs7159947  | 21 | rs2823032  | 6.39E-03 | 0.119322 |
| 16 | rs4784508  | 19 | rs7408169  | 6.39E-03 | NA       |
| 5  | rs411172   | 17 | rs2017854  | 6.39E-03 | 0.240363 |
| 12 | rs11104939 | 17 | rs203076   | 6.42E-03 | NA       |
| 11 | rs2514890  | 18 | rs8096537  | 6.43E-03 | 0.427318 |
| 8  | rs9643449  | 18 | rs7240747  | 6.45E-03 | 0.782680 |
| 2  | rs2292388  | 7  | rs2526100  | 6.45E-03 | 0.471687 |
| 10 | rs4750934  | 15 | rs999742   | 6.50E-03 | 0.586897 |
| 1  | rs215773   | 15 | rs7163502  | 6.53E-03 | NA       |
| 12 | rs7975892  | 14 | rs964431   | 6.54E-03 | NA       |
| 6  | rs9346240  | 21 | rs2823032  | 6.59E-03 | 0.402364 |
| 4  | rs12640371 | 15 | rs901130   | 6.59E-03 | NA       |
| 2  | rs4641882  | 11 | rs1392998  | 6.60E-03 | 0.668081 |
| 2  | rs1375144  | 5  | rs4400148  | 6.62E-03 | 0.145745 |
| 4  | rs6856121  | 4  | rs2055392  | 6.64E-03 | 0.826079 |
| 2  | rs1375144  | 5  | rs27000    | 6.66E-03 | 0.341043 |
| 4  | rs10025322 | 11 | rs4922556  | 6.67E-03 | 0.995946 |
| 11 | rs10832653 | 21 | rs229040   | 6.69E-03 | 0.452339 |
| 6  | rs9295140  | 13 | rs4550321  | 6.80E-03 | 0.337759 |
| 16 | rs12149894 | 19 | rs7247513  | 6.86E-03 | 0.872961 |

|    |            |    |            |          |          |
|----|------------|----|------------|----------|----------|
| 6  | rs501241   | 18 | rs12960691 | 6.88E-03 | NA       |
| 11 | rs10898976 | 16 | rs3935873  | 6.90E-03 | NA       |
| 14 | rs6571488  | 22 | rs17435801 | 6.93E-03 | 0.643613 |
| 6  | rs6912394  | 14 | rs964431   | 6.94E-03 | NA       |
| 1  | rs12130132 | 4  | rs7691186  | 6.94E-03 | NA       |
| 2  | rs7573844  | 3  | rs6439389  | 6.96E-03 | 0.359978 |
| 2  | rs10187657 | 14 | rs964431   | 6.99E-03 | NA       |
| 6  | rs501241   | 10 | rs12356059 | 7.01E-03 | NA       |
| 11 | rs10898976 | 16 | rs4784508  | 7.05E-03 | NA       |
| 9  | rs10989064 | 14 | rs2354445  | 7.05E-03 | 0.150922 |
| 7  | rs6972063  | 9  | rs10982256 | 7.06E-03 | 0.185737 |
| 3  | rs4134190  | 13 | rs4550321  | 7.07E-03 | 0.887897 |
| 2  | rs2292388  | 14 | rs11626813 | 7.08E-03 | 0.260749 |
| 14 | rs2293732  | 18 | rs7240747  | 7.10E-03 | 0.026487 |
| 6  | rs9370893  | 9  | rs10989064 | 7.12E-03 | 0.672291 |
| 4  | rs12640371 | 10 | rs10826258 | 7.14E-03 | NA       |
| 1  | rs12130132 | 10 | rs6602256  | 7.17E-03 | NA       |
| 3  | rs906482   | 8  | rs3019878  | 7.20E-03 | 0.852517 |
| 2  | rs11687654 | 20 | rs1885290  | 7.21E-03 | 0.022609 |
| 5  | rs1862618  | 8  | rs6472997  | 7.23E-03 | NA       |
| 7  | rs2237318  | 13 | rs4942472  | 7.26E-03 | NA       |
| 10 | rs12356059 | 11 | rs7932890  | 7.30E-03 | 0.628033 |
| 1  | rs12145699 | 12 | rs11104939 | 7.35E-03 | NA       |
| 13 | rs1540460  | 17 | rs2017854  | 7.36E-03 | 0.806189 |
| 18 | rs8096537  | 18 | rs7240747  | 7.41E-03 | 0.136853 |
| 4  | rs2055392  | 14 | rs7159947  | 7.43E-03 | 0.952682 |
| 10 | rs1491192  | 18 | rs12960691 | 7.43E-03 | 0.639217 |
| 8  | rs7016497  | 14 | rs2354445  | 7.48E-03 | 0.235302 |
| 3  | rs1541855  | 8  | rs10097578 | 7.49E-03 | 0.092797 |
| 6  | rs700496   | 7  | rs6972063  | 7.50E-03 | 0.076489 |
| 5  | rs1428006  | 21 | rs12482209 | 7.53E-03 | NA       |
| 2  | rs7562696  | 4  | rs17147420 | 7.53E-03 | 0.726489 |
| 6  | rs13196792 | 11 | rs4938280  | 7.59E-03 | 0.987138 |
| 4  | rs6856121  | 6  | rs1029123  | 7.62E-03 | 0.951462 |
| 5  | rs10060800 | 7  | rs2402752  | 7.65E-03 | 0.462599 |
| 3  | rs6443856  | 10 | rs7899892  | 7.66E-03 | 0.624007 |
| 3  | rs4858594  | 15 | rs4420487  | 7.67E-03 | 0.074699 |
| 6  | rs1171115  | 10 | rs7896131  | 7.69E-03 | 0.807878 |
| 14 | rs3784004  | 18 | rs1893146  | 7.70E-03 | 0.364857 |
| 1  | rs7534239  | 13 | rs1638703  | 7.70E-03 | 0.015152 |
| 6  | rs7763010  | 8  | rs11787515 | 7.70E-03 | 0.322840 |
| 5  | rs10060800 | 22 | rs165650   | 7.71E-03 | 0.439791 |
| 4  | rs12640371 | 11 | rs10898976 | 7.73E-03 | NA       |
| 4  | rs12640371 | 11 | rs4945441  | 7.80E-03 | NA       |

|    |            |    |            |          |          |
|----|------------|----|------------|----------|----------|
| 12 | rs11067270 | 15 | rs17599989 | 7.82E-03 | 0.782134 |
| 1  | rs736861   | 14 | rs1568404  | 7.89E-03 | 0.029161 |
| 3  | rs1541855  | 7  | rs2774960  | 7.91E-03 | 0.937910 |
| 3  | rs4627791  | 8  | rs1993980  | 7.94E-03 | NA       |
| 15 | rs901130   | 19 | rs10409187 | 7.97E-03 | NA       |
| 3  | rs11130858 | 5  | rs27000    | 8.01E-03 | 0.347131 |
| 7  | rs11976431 | 9  | rs901992   | 8.02E-03 | 0.392365 |
| 7  | rs2285757  | 21 | rs229040   | 8.05E-03 | 0.822361 |
| 11 | rs10790633 | 13 | rs7333011  | 8.06E-03 | 0.523117 |
| 13 | rs7333011  | 16 | rs4782872  | 8.09E-03 | 0.379863 |
| 16 | rs12149894 | 18 | rs7239844  | 8.09E-03 | NA       |
| 5  | rs792975   | 9  | rs7860900  | 8.10E-03 | NA       |
| 11 | rs2201845  | 14 | rs2354445  | 8.13E-03 | 0.208301 |
| 8  | rs3019878  | 14 | rs964431   | 8.14E-03 | NA       |
| 13 | rs1149839  | 19 | rs2061332  | 8.15E-03 | 0.209182 |
| 10 | rs2096285  | 18 | rs12960691 | 8.17E-03 | 0.361911 |
| 1  | rs12145699 | 11 | rs11223704 | 8.18E-03 | NA       |
| 2  | rs6750543  | 16 | rs7187198  | 8.21E-03 | 0.650380 |
| 4  | rs965253   | 14 | rs17108400 | 8.22E-03 | 0.200560 |
| 3  | rs7630226  | 18 | rs8096537  | 8.27E-03 | 0.808377 |
| 3  | rs2240920  | 13 | rs1638703  | 8.28E-03 | 0.421652 |
| 3  | rs6783478  | 19 | rs2061332  | 8.28E-03 | NA       |
| 1  | rs396954   | 6  | rs7763010  | 8.29E-03 | 0.904178 |
| 2  | rs1344706  | 8  | rs6472997  | 8.29E-03 | NA       |
| 9  | rs7872727  | 10 | rs10905203 | 8.32E-03 | 0.106801 |
| 3  | rs6439389  | 17 | rs2108978  | 8.33E-03 | 0.604812 |
| 6  | rs2763025  | 8  | rs1993980  | 8.34E-03 | NA       |
| 3  | rs150219   | 19 | rs2191566  | 8.40E-03 | 0.842660 |
| 5  | rs1490796  | 6  | rs9370893  | 8.42E-03 | 0.020963 |
| 2  | rs10188509 | 18 | rs11877435 | 8.44E-03 | 0.957795 |
| 4  | rs6856121  | 16 | rs3935873  | 8.45E-03 | 0.234255 |
| 10 | rs12356059 | 14 | rs6571488  | 8.49E-03 | 0.384833 |
| 14 | rs2293732  | 19 | rs10407941 | 8.50E-03 | 0.385960 |
| 5  | rs2589653  | 7  | rs2355066  | 8.51E-03 | NA       |
| 10 | rs1540956  | 14 | rs8019107  | 8.52E-03 | 0.725337 |
| 2  | rs2576742  | 2  | rs6750543  | 8.53E-03 | 0.040225 |
| 2  | rs2576742  | 17 | rs2108978  | 8.56E-03 | 0.848608 |
| 9  | rs888230   | 11 | rs10832653 | 8.57E-03 | 0.600747 |
| 1  | rs12145699 | 13 | rs1638703  | 8.57E-03 | NA       |
| 14 | rs17197037 | 19 | rs7408169  | 8.59E-03 | NA       |
| 1  | rs3896178  | 8  | rs7016497  | 8.60E-03 | 0.180519 |
| 2  | rs2576742  | 11 | rs4945441  | 8.61E-03 | 0.095373 |
| 1  | rs6665548  | 11 | rs7932890  | 8.61E-03 | 0.292432 |
| 3  | rs2900668  | 10 | rs10764062 | 8.62E-03 | 0.740476 |

|    |            |    |            |          |          |
|----|------------|----|------------|----------|----------|
| 2  | rs10182324 | 20 | rs6031991  | 8.62E-03 | 0.169110 |
| 3  | rs2033701  | 7  | rs6972063  | 8.63E-03 | 0.746827 |
| 10 | rs10905203 | 19 | rs11672395 | 8.64E-03 | 0.532510 |
| 2  | rs4666562  | 5  | rs10041283 | 8.67E-03 | 0.796375 |
| 3  | rs6783478  | 19 | rs2191566  | 8.68E-03 | NA       |
| 8  | rs1545453  | 14 | rs8011085  | 8.73E-03 | 0.009848 |
| 5  | rs1211159  | 17 | rs2108978  | 8.74E-03 | 0.162176 |
| 5  | rs792975   | 9  | rs4879540  | 8.75E-03 | NA       |
| 11 | rs10832653 | 19 | rs2191566  | 8.78E-03 | 0.736131 |
| 8  | rs16919670 | 19 | rs1048123  | 8.79E-03 | 0.297741 |
| 1  | rs11207909 | 10 | rs6602256  | 8.80E-03 | 0.214119 |
| 2  | rs4027132  | 14 | rs1568404  | 8.80E-03 | 0.106101 |
| 5  | rs255375   | 6  | rs9346240  | 8.82E-03 | 0.260188 |
| 1  | rs4628571  | 3  | rs906482   | 8.82E-03 | 0.732290 |
| 3  | rs1541855  | 4  | rs2055392  | 8.83E-03 | 0.966805 |
| 2  | rs3754895  | 18 | rs614841   | 8.84E-03 | 0.753119 |
| 3  | rs2033701  | 19 | rs759071   | 8.86E-03 | 0.375367 |
| 8  | rs16919670 | 17 | rs4924803  | 8.88E-03 | 0.288131 |
| 6  | rs17739564 | 8  | rs12056374 | 8.89E-03 | 0.794760 |
| 10 | rs1892302  | 17 | rs2017854  | 8.90E-03 | 0.618732 |
| 6  | rs17739564 | 13 | rs179356   | 8.91E-03 | 0.340191 |
| 4  | rs6819526  | 4  | rs6850978  | 8.91E-03 | 0.114883 |
| 3  | rs4134190  | 15 | rs12595660 | 8.92E-03 | 0.558420 |
| 2  | rs17248501 | 14 | rs10438244 | 8.95E-03 | 0.211406 |
| 10 | rs788261   | 14 | rs964431   | 9.08E-03 | NA       |
| 1  | rs6691577  | 4  | rs6850978  | 9.09E-03 | 0.940205 |
| 10 | rs10826258 | 15 | rs901130   | 9.10E-03 | 0.232702 |
| 3  | rs4627791  | 11 | rs4945441  | 9.10E-03 | 0.963430 |
| 4  | rs4956324  | 19 | rs10407941 | 9.13E-03 | 0.145525 |
| 2  | rs4666562  | 11 | rs4945441  | 9.14E-03 | 0.817617 |
| 1  | rs6604643  | 10 | rs10905203 | 9.15E-03 | 0.542414 |
| 8  | rs10504768 | 15 | rs999742   | 9.16E-03 | 0.613979 |
| 1  | rs7534239  | 5  | rs3934500  | 9.18E-03 | 0.155082 |
| 7  | rs6972063  | 19 | rs2061332  | 9.18E-03 | 0.406131 |
| 2  | rs10182324 | 19 | rs759071   | 9.19E-03 | 0.986082 |
| 2  | rs7570682  | 19 | rs1048123  | 9.19E-03 | 0.607919 |
| 3  | rs2900668  | 6  | rs1171115  | 9.20E-03 | 0.554435 |
| 16 | rs4784508  | 19 | rs7247513  | 9.26E-03 | 0.819615 |
| 5  | rs792975   | 10 | rs3121466  | 9.26E-03 | 0.397662 |
| 8  | rs10504768 | 14 | rs2354445  | 9.27E-03 | 0.126875 |
| 6  | rs1171115  | 11 | rs2201845  | 9.30E-03 | 0.928868 |
| 6  | rs1029123  | 14 | rs17108400 | 9.30E-03 | 0.987544 |
| 7  | rs17568678 | 10 | rs17537423 | 9.33E-03 | 0.568105 |
| 1  | rs12145699 | 14 | rs17442995 | 9.33E-03 | NA       |

|    |            |    |            |          |          |
|----|------------|----|------------|----------|----------|
| 1  | rs215773   | 11 | rs4372426  | 9.33E-03 | NA       |
| 3  | rs906482   | 3  | rs779331   | 9.38E-03 | NA       |
| 4  | rs12640371 | 21 | rs229040   | 9.44E-03 | NA       |
| 2  | rs10182324 | 20 | rs1885290  | 9.46E-03 | 0.830420 |
| 9  | rs4879540  | 13 | rs12584910 | 9.46E-03 | NA       |
| 4  | rs11098416 | 11 | rs4922556  | 9.53E-03 | 0.241785 |
| 13 | rs179356   | 18 | rs11877435 | 9.55E-03 | 0.736126 |
| 1  | rs215773   | 11 | rs1392998  | 9.56E-03 | 0.481239 |
| 9  | rs10812869 | 11 | rs4922556  | 9.58E-03 | 0.901587 |
| 1  | rs7519141  | 10 | rs10764062 | 9.60E-03 | 0.715408 |
| 1  | rs207190   | 2  | rs4280420  | 9.63E-03 | NA       |
| 18 | rs614841   | 19 | rs2061332  | 9.70E-03 | 0.142854 |
| 14 | rs17108400 | 18 | rs9947947  | 9.73E-03 | 0.157984 |
| 1  | rs2989476  | 12 | rs1245652  | 9.76E-03 | 0.154531 |
| 6  | rs1006997  | 14 | rs2354445  | 9.76E-03 | 0.778838 |
| 10 | rs10826258 | 21 | rs12482209 | 9.78E-03 | 0.833321 |
| 4  | rs6850978  | 9  | rs888230   | 9.79E-03 | 0.093060 |
| 12 | rs11104939 | 14 | rs17197037 | 9.84E-03 | NA       |
| 14 | rs2354445  | 21 | rs417836   | 9.84E-03 | NA       |
| 5  | rs10041283 | 9  | rs7872727  | 9.86E-03 | 0.773722 |
| 9  | rs1573257  | 14 | rs17442995 | 9.86E-03 | 0.664014 |
| 11 | rs356242   | 18 | rs1893146  | 9.87E-03 | 0.409772 |
| 9  | rs901992   | 9  | rs10979540 | 9.88E-03 | 0.940376 |
| 1  | rs207190   | 2  | rs7570682  | 9.92E-03 | NA       |
| 1  | rs12130132 | 22 | rs11089599 | 9.95E-03 | NA       |

**Table S2.** The top significant ( $p \leq 10^{-5}$ ) interactions based upon all variants in *ANK3* tested against the rest of the genome in the WTCCC un-pruned data and the corresponding interaction p-values in GAIN dataset.

| chr1 | snp1       | chr2 | snp2       | p_WTCCC  | p_GAIN      |
|------|------------|------|------------|----------|-------------|
| 10   | rs7077937  | 18   | rs1597850  | 2.37E-06 | 0.001925119 |
| 10   | rs12413212 | 6    | rs13207025 | 3.17E-06 | 0.011350482 |
| 10   | rs11596260 | 18   | rs1597850  | 1.92E-06 | 0.013997445 |
| 10   | rs3213829  | 7    | rs7780479  | 8.30E-06 | 0.02298822  |
| 10   | rs3213829  | 1    | rs603794   | 9.01E-06 | 0.025312465 |
| 10   | rs7098008  | 14   | rs10483877 | 5.06E-06 | 0.049359865 |
| 10   | rs7086260  | 14   | rs4996830  | 6.79E-06 | 0.051664724 |
| 10   | rs1981251  | 11   | rs4910085  | 2.68E-06 | 0.053315317 |
| 10   | rs12357206 | 5    | rs250100   | 7.49E-06 | 0.061647744 |
| 10   | rs2018783  | 2    | rs6713577  | 4.44E-06 | 0.103564611 |
| 10   | rs2018783  | 12   | rs11109339 | 2.48E-06 | 0.108976702 |
| 10   | rs2018783  | 2    | rs11683668 | 9.73E-06 | 0.141679375 |
| 10   | rs6479707  | 4    | rs6536694  | 7.51E-06 | 0.182461392 |
| 10   | rs7098008  | 14   | rs11623512 | 9.23E-06 | 0.18448778  |
| 10   | rs1981251  | 11   | rs715059   | 2.72E-06 | 0.236290365 |
| 10   | rs12767186 | 11   | rs1550617  | 4.80E-06 | 0.241346811 |
| 10   | rs17805456 | 18   | rs16953853 | 5.09E-06 | 0.262020669 |
| 10   | rs1981251  | 5    | rs2453828  | 9.57E-06 | 0.278657911 |
| 10   | rs10740011 | 2    | rs2121301  | 7.42E-06 | 0.283622649 |
| 10   | rs10761488 | 13   | rs4625581  | 1.92E-06 | 0.297133525 |
| 10   | rs17805456 | 18   | rs16953869 | 5.01E-06 | 0.307354597 |
| 10   | rs10821659 | 8    | rs2916755  | 1.11E-06 | 0.324921817 |
| 10   | rs4948256  | 8    | rs4738836  | 1.35E-06 | 0.334287848 |
| 10   | rs10821659 | 8    | rs3020210  | 8.60E-06 | 0.369496844 |
| 10   | rs10994259 | 8    | rs2340768  | 9.12E-06 | 0.382026879 |
| 10   | rs7077937  | 18   | rs549104   | 5.97E-06 | 0.386916972 |
| 10   | rs7907721  | 13   | rs4772030  | 5.14E-06 | 0.398607592 |
| 10   | rs17805456 | 1    | rs4970988  | 7.35E-06 | 0.42046779  |
| 10   | rs7906905  | 8    | rs2916755  | 8.85E-06 | 0.422507245 |
| 10   | rs10994259 | 8    | rs13279907 | 8.97E-06 | 0.449734918 |
| 10   | rs10994259 | 8    | rs2441872  | 5.17E-06 | 0.460048796 |
| 10   | rs7896287  | 4    | rs2175397  | 1.90E-06 | 0.462476841 |
| 10   | rs6479707  | 15   | rs16975700 | 3.42E-06 | 0.466159123 |
| 10   | rs7896287  | 4    | rs6832987  | 2.14E-06 | 0.472552589 |
| 10   | rs1340655  | 6    | rs2146755  | 9.39E-06 | 0.474767398 |
| 10   | rs7896287  | 4    | rs3733558  | 2.51E-06 | 0.475680414 |
| 10   | rs12357206 | 4    | rs552582   | 6.07E-07 | 0.476597768 |
| 10   | rs1340655  | 12   | rs4963844  | 2.88E-06 | 0.484618098 |
| 10   | rs3213829  | 9    | rs7034055  | 5.10E-06 | 0.504159126 |
| 10   | rs7070364  | 8    | rs17236705 | 8.17E-06 | 0.513154344 |

|    |            |    |            |          |             |
|----|------------|----|------------|----------|-------------|
| 10 | rs12357206 | 4  | rs442155   | 2.63E-06 | 0.540375762 |
| 10 | rs17805456 | 18 | rs1394360  | 2.12E-06 | 0.547567027 |
| 10 | rs10821744 | 9  | rs4741377  | 2.08E-06 | 0.551637531 |
| 10 | rs1981251  | 8  | rs6998544  | 1.02E-06 | 0.557893078 |
| 10 | rs12767186 | 17 | rs4793659  | 8.24E-06 | 0.563325863 |
| 10 | rs10821744 | 9  | rs4741376  | 2.95E-06 | 0.575701541 |
| 10 | rs7896287  | 1  | rs6701999  | 7.67E-06 | 0.58366994  |
| 10 | rs4582919  | 9  | rs2039052  | 8.69E-08 | 0.591244225 |
| 10 | rs17805456 | 18 | rs323099   | 1.70E-06 | 0.594125773 |
| 10 | rs10821727 | 13 | rs4625581  | 4.81E-06 | 0.596301499 |
| 10 | rs1380455  | 9  | rs4741377  | 1.97E-06 | 0.596801434 |
| 10 | rs7901951  | 12 | rs1039225  | 4.71E-06 | 0.611750654 |
| 10 | rs2199209  | 13 | rs4625581  | 5.04E-06 | 0.614076182 |
| 10 | rs1380455  | 9  | rs4741376  | 2.79E-06 | 0.622060598 |
| 10 | rs12767186 | 17 | rs17783280 | 9.22E-06 | 0.640394476 |
| 10 | rs7901951  | 9  | rs13292544 | 3.56E-06 | 0.656753743 |
| 10 | rs11596260 | 20 | rs275292   | 1.35E-07 | 0.665409398 |
| 10 | rs11596260 | 12 | rs1444096  | 7.93E-06 | 0.673179764 |
| 10 | rs7072841  | 9  | rs4741377  | 1.44E-06 | 0.673370298 |
| 10 | rs4147263  | 9  | rs4741377  | 7.01E-06 | 0.699395901 |
| 10 | rs10821731 | 9  | rs2039052  | 1.05E-07 | 0.701248047 |
| 10 | rs7072841  | 9  | rs4741376  | 2.05E-06 | 0.701750489 |
| 10 | rs10821729 | 9  | rs2039052  | 6.61E-08 | 0.726545072 |
| 10 | rs4147263  | 9  | rs4741376  | 9.87E-06 | 0.727159303 |
| 10 | rs1981251  | 8  | rs10955734 | 1.45E-06 | 0.740130289 |
| 10 | rs10994310 | 13 | rs4625581  | 2.11E-06 | 0.762212485 |
| 10 | rs7901951  | 15 | rs16949647 | 2.36E-06 | 0.765909377 |
| 10 | rs17805456 | 1  | rs2272214  | 3.95E-06 | 0.768664226 |
| 10 | rs10994310 | 11 | rs7924341  | 4.38E-06 | 0.772918618 |
| 10 | rs4620673  | 13 | rs4625581  | 2.05E-06 | 0.789435707 |
| 10 | rs1981251  | 8  | rs2884250  | 7.60E-07 | 0.792276953 |
| 10 | rs10821731 | 9  | rs4741377  | 3.99E-09 | 0.792868877 |
| 10 | rs10821731 | 9  | rs4741376  | 6.75E-09 | 0.79570181  |
| 10 | rs4520549  | 13 | rs4625581  | 1.17E-06 | 0.807146372 |
| 10 | rs7096426  | 13 | rs4625581  | 2.01E-06 | 0.807404994 |
| 10 | rs10994259 | 1  | rs478492   | 9.91E-06 | 0.811994725 |
| 10 | rs7096426  | 11 | rs7924341  | 4.66E-06 | 0.815877076 |
| 10 | rs10821729 | 9  | rs4741377  | 2.46E-09 | 0.824579767 |
| 10 | rs4620673  | 11 | rs7924341  | 3.32E-06 | 0.825630281 |
| 10 | rs2393625  | 13 | rs4625581  | 2.70E-06 | 0.828114757 |
| 10 | rs10821729 | 9  | rs4741376  | 4.19E-09 | 0.830225127 |
| 10 | rs10740011 | 2  | rs13009328 | 2.10E-06 | 0.834343452 |
| 10 | rs10821730 | 13 | rs4625581  | 2.99E-06 | 0.835298846 |
| 10 | rs10994259 | 1  | rs587026   | 7.37E-06 | 0.837734689 |



|    |               |    |            |          |             |
|----|---------------|----|------------|----------|-------------|
| 10 | rs4520549     | 11 | rs7924341  | 4.44E-06 | 0.859084148 |
| 10 | rs10821731    | 9  | rs1008943  | 3.63E-08 | 0.865169305 |
| 10 | rs7070364     | 8  | rs1483179  | 8.49E-06 | 0.868067245 |
| 10 | rs4582919     | 9  | rs4741377  | 3.32E-09 | 0.889295263 |
| 10 | rs10821727    | 11 | rs7924341  | 5.78E-06 | 0.892999608 |
| 10 | rs4582919     | 9  | rs4741376  | 5.62E-09 | 0.893278084 |
| 10 | rs11596260    | 14 | rs1959527  | 2.30E-06 | 0.895598502 |
| 10 | rs3750800     | 2  | rs6745675  | 3.19E-06 | 0.901033003 |
| 10 | rs2393625     | 11 | rs7924341  | 4.22E-06 | 0.901766108 |
| 10 | rs10761488    | 11 | rs7924341  | 3.72E-06 | 0.909525702 |
| 10 | rs991405      | 11 | rs7924341  | 4.29E-06 | 0.9142397   |
| 10 | rs7906905     | 10 | rs2999333  | 9.83E-06 | 0.926019045 |
| 10 | rs10821729    | 9  | rs303727   | 9.90E-06 | 0.949025163 |
| 10 | rs10821729    | 9  | rs1008943  | 2.24E-08 | 0.954078455 |
| 10 | rs7070364     | 8  | rs9298059  | 5.46E-06 | 0.955082194 |
| 10 | rs991405      | 13 | rs4625581  | 1.20E-06 | 0.958322616 |
| 10 | rs7907721     | 1  | rs1198589  | 8.76E-06 | 0.967232641 |
| 10 | rs1340655     | 1  | rs508992   | 8.48E-06 | 0.970133161 |
| 10 | rs4582919     | 9  | rs1008943  | 2.54E-08 | 0.972842527 |
| 10 | rs1340655     | 1  | rs478492   | 8.05E-06 | 0.983825399 |
| 10 | rs1340655     | 1  | rs587026   | 4.99E-06 | 0.989850118 |
| 10 | rs17805456    | 1  | rs3768015  | 4.86E-06 | 0.989919093 |
| 10 | rs10821730    | 11 | rs7924341  | 5.14E-06 | 0.999049584 |
| 10 | rs10761452    | 14 | rs1959527  | 7.57E-06 | NA          |
| 10 | rs10761452    | 18 | rs1597850  | 5.53E-07 | NA          |
| 10 | rs10761452    | 20 | rs275292   | 5.63E-08 | NA          |
| 10 | rs10994209    | 2  | rs13009328 | 3.64E-06 | NA          |
| 10 | rs17805456    | 1  | rs12401316 | 7.82E-06 | NA          |
| 10 | rs10821700    | 1  | rs7414981  | 4.86E-06 | NA          |
| 10 | SNP_A-2288436 | 1  | rs7414981  | 2.28E-06 | NA          |
| 10 | rs7908312     | 1  | rs7414981  | 3.22E-06 | NA          |
| 10 | rs10821707    | 1  | rs7414981  | 7.22E-06 | NA          |
| 10 | rs10821713    | 1  | rs1073712  | 5.69E-06 | NA          |
| 10 | rs10821713    | 1  | rs1324364  | 9.68E-06 | NA          |
| 10 | rs10821713    | 1  | rs2806541  | 9.95E-06 | NA          |
| 10 | rs10821713    | 2  | rs1992881  | 1.41E-06 | NA          |
| 10 | rs10821713    | 8  | rs2884250  | 5.09E-06 | NA          |
| 10 | rs991405      | 12 | rs6539127  | 6.57E-06 | NA          |
| 10 | rs10821730    | 12 | rs6539127  | 5.39E-06 | NA          |
| 10 | rs4520549     | 12 | rs6539127  | 2.77E-06 | NA          |
| 10 | rs4620673     | 12 | rs6539127  | 5.37E-06 | NA          |
| 10 | rs10761488    | 12 | rs6539127  | 5.67E-06 | NA          |
| 10 | rs10994310    | 12 | rs6539127  | 4.90E-06 | NA          |
| 10 | rs7096426     | 12 | rs6539127  | 4.93E-06 | NA          |

|    |               |    |               |          |    |
|----|---------------|----|---------------|----------|----|
| 10 | rs2393625     | 12 | rs6539127     | 4.57E-06 | NA |
| 10 | SNP_A-2094979 | 2  | rs7567215     | 1.51E-06 | NA |
| 10 | rs7896287     | 4  | rs4532258     | 2.57E-06 | NA |
| 10 | rs7896287     | 4  | SNP_A-1804351 | 3.85E-06 | NA |
| 10 | rs7896287     | 4  | SNP_A-2218634 | 1.64E-06 | NA |

**Table S3.** The top significant ( $p \leq 10^{-5}$ ) interactions based upon strongest associated SNPs in *ANK3* (rs1938526,  $p = 1.3 \times 10^{-8}$ ) and in *CACNA1C* (rs1006737,  $p = 7.0 \times 10^{-8}$ ) against the whole genome in the WTCCC data and the corresponding interaction p-values in the GAIN data.

|                | CHR1 | SNP1      | CHR2 | SNP2       | P_WTCCC  | P_GAIN   |
|----------------|------|-----------|------|------------|----------|----------|
| <i>ANK3</i>    |      |           |      |            |          |          |
|                | 10   | rs1938526 | 15   | rs7176022  | 7.67E-08 | 0.427982 |
|                | 10   | rs1938526 | 15   | rs6495126  | 1.73E-06 | 0.280345 |
|                | 10   | rs1938526 | 15   | rs2472299  | 2.44E-06 | 0.319215 |
|                | 10   | rs1938526 | 15   | rs2472300  | 3.83E-06 | 0.296906 |
|                | 10   | rs1938526 | 3    | rs12638324 | 5.02E-06 | 0.230296 |
|                | 10   | rs1938526 | 3    | rs8177272  | 8.70E-06 | 0.464671 |
|                | 10   | rs1938526 | 3    | rs4854762  | 8.80E-06 | 0.354231 |
|                | 10   | rs1938526 | 3    | rs7638018  | 9.11E-06 | 0.450873 |
| <i>CACNA1C</i> |      |           |      |            |          |          |
|                | 12   | rs1006737 | 8    | rs10090710 | 8.44E-07 | 0.42207  |
|                | 12   | rs1006737 | 8    | rs1391466  | 1.26E-06 | 0.446011 |

**Table S4.** The top significant ( $p \leq 0.01$ ) interactions among all SNPs in genes encoding dihydropyridine-sensitive calcium channel subunits (not LD pruned,  $N = 204$ ) without selecting on the basis of  $p$ -values in the WTCCC data and the corresponding interaction  $p$ -values in the GAIN data.

| chr1 | snp1       | chr2 | snp2       | p_WTCCC  | p_GAIN      |
|------|------------|------|------------|----------|-------------|
| 1    | rs3767499  | 12   | rs2239087  | 5.18E-03 | 0.005928947 |
| 1    | rs4915475  | 12   | rs2239087  | 1.64E-03 | 0.009503958 |
| 1    | rs4915475  | 12   | rs1860095  | 9.19E-03 | 0.015195373 |
| 1    | rs12737822 | 3    | rs2077167  | 3.11E-03 | 0.020595999 |
| 1    | rs4915215  | 12   | rs7302743  | 6.71E-03 | 0.026846366 |
| 3    | rs6794085  | 12   | rs2239074  | 6.62E-03 | 0.028515324 |
| 3    | rs6794085  | 7    | rs2237511  | 2.87E-03 | 0.031100823 |
| 7    | rs10486945 | 7    | rs42237    | 7.37E-03 | 0.034467553 |
| 12   | rs2238043  | 12   | rs2239061  | 3.13E-03 | 0.039424495 |
| 7    | rs1157097  | 7    | rs42237    | 7.85E-03 | 0.043760221 |
| 7    | rs1862124  | 12   | rs2238070  | 1.55E-03 | 0.044708954 |
| 3    | rs6763245  | 7    | rs2097915  | 1.66E-03 | 0.052734258 |
| 3    | rs6763245  | 7    | rs2237511  | 2.53E-03 | 0.069208855 |
| 1    | rs4915215  | 3    | rs11719179 | 2.46E-03 | 0.077128635 |
| 7    | rs10486945 | 7    | rs13245449 | 3.38E-03 | 0.106819057 |
| 7    | rs1862124  | 12   | rs3819526  | 6.32E-03 | 0.113614308 |
| 3    | rs979220   | 12   | rs1108385  | 6.55E-03 | 0.11377533  |
| 7    | rs10486945 | 7    | rs12707486 | 3.44E-03 | 0.114644671 |
| 7    | rs1157097  | 7    | rs13245449 | 2.53E-03 | 0.114881589 |
| 7    | rs2097915  | 7    | rs17180597 | 3.85E-03 | 0.121682797 |
| 7    | rs1157097  | 7    | rs12707486 | 2.46E-03 | 0.123024934 |
| 3    | rs979220   | 12   | rs2238083  | 7.40E-03 | 0.128603877 |
| 1    | rs6689533  | 3    | rs11721212 | 6.25E-03 | 0.135732183 |
| 3    | rs2077167  | 7    | rs2237511  | 1.53E-03 | 0.141680672 |
| 12   | rs4370987  | 12   | rs2239074  | 3.26E-03 | 0.145345244 |
| 7    | rs17821377 | 7    | rs2190237  | 3.55E-03 | 0.147487618 |
| 3    | rs6794085  | 7    | rs2097915  | 3.10E-04 | 0.148185872 |
| 7    | rs17832393 | 7    | rs2190237  | 1.34E-03 | 0.14851036  |
| 3    | rs3774491  | 7    | rs2237511  | 5.61E-03 | 0.151348312 |
| 3    | rs979220   | 12   | rs2238079  | 3.06E-03 | 0.153009215 |
| 7    | rs1157097  | 12   | rs1034936  | 7.13E-03 | 0.157928654 |
| 3    | rs898415   | 7    | rs2237511  | 4.90E-03 | 0.158308803 |
| 7    | rs2097915  | 7    | rs12670011 | 9.23E-03 | 0.16198482  |
| 7    | rs2097915  | 7    | rs12669716 | 1.86E-03 | 0.16384804  |
| 3    | rs2077167  | 7    | rs2097915  | 2.82E-04 | 0.166306859 |
| 3    | rs1380606  | 7    | rs2237511  | 4.95E-03 | 0.16698542  |
| 3    | rs3774570  | 12   | rs2239074  | 9.79E-03 | 0.172310159 |
| 3    | rs898416   | 7    | rs2237511  | 4.17E-03 | 0.182648131 |
| 7    | rs2097915  | 7    | rs12533606 | 9.83E-03 | 0.185302455 |

|    |            |    |            |          |             |
|----|------------|----|------------|----------|-------------|
| 12 | rs2239015  | 12 | rs6489375  | 4.95E-03 | 0.186528036 |
| 7  | rs17821377 | 7  | rs1468400  | 3.24E-03 | 0.19368451  |
| 7  | rs17832393 | 7  | rs1468400  | 1.36E-03 | 0.194555112 |
| 7  | rs10231240 | 12 | rs6489375  | 7.39E-03 | 0.194593065 |
| 3  | rs7617553  | 7  | rs12533606 | 8.93E-03 | 0.201511615 |
| 1  | rs10494827 | 7  | rs258728   | 1.68E-03 | 0.209270591 |
| 7  | rs17821377 | 7  | rs7788848  | 4.36E-03 | 0.211357773 |
| 7  | rs17832393 | 7  | rs7788848  | 1.88E-03 | 0.212271516 |
| 12 | rs11062161 | 12 | rs929492   | 6.90E-03 | 0.214256029 |
| 7  | rs42342    | 12 | rs2238056  | 9.28E-03 | 0.2165161   |
| 7  | rs7800392  | 7  | rs2190237  | 3.64E-03 | 0.221706684 |
| 12 | rs2239030  | 12 | rs929492   | 4.85E-03 | 0.236824311 |
| 12 | rs2370411  | 12 | rs4765679  | 5.91E-03 | 0.237018429 |
| 7  | rs17821377 | 7  | rs978326   | 2.59E-03 | 0.23733928  |
| 7  | rs17832393 | 7  | rs978326   | 1.20E-03 | 0.238115398 |
| 7  | rs42049    | 12 | rs2238056  | 9.48E-03 | 0.249499917 |
| 7  | rs3801740  | 12 | rs10774037 | 7.86E-03 | 0.253279311 |
| 3  | rs979220   | 3  | rs13076366 | 7.06E-03 | 0.255066864 |
| 7  | rs7800392  | 7  | rs7788848  | 4.95E-03 | 0.255657427 |
| 7  | rs3801767  | 12 | rs2238070  | 2.95E-03 | 0.256924516 |
| 3  | rs979220   | 3  | rs11719179 | 4.02E-03 | 0.257648782 |
| 7  | rs2237511  | 7  | rs17180597 | 9.69E-03 | 0.2648796   |
| 7  | rs929381   | 7  | rs12533606 | 8.93E-03 | 0.265884855 |
| 7  | rs929381   | 7  | rs17180597 | 3.23E-03 | 0.267956155 |
| 7  | rs12533606 | 7  | rs42237    | 7.29E-03 | 0.270683353 |
| 3  | rs3774425  | 12 | rs2239109  | 4.73E-03 | 0.275621116 |
| 1  | rs10920106 | 12 | rs4765663  | 1.18E-03 | 0.275802876 |
| 7  | rs10486945 | 12 | rs1034936  | 3.72E-03 | 0.276213284 |
| 7  | rs7800392  | 7  | rs1468400  | 3.69E-03 | 0.281238555 |
| 7  | rs929381   | 7  | rs12707486 | 8.95E-03 | 0.28915372  |
| 3  | rs898415   | 7  | rs2097915  | 2.73E-03 | 0.289869444 |
| 7  | rs3801742  | 12 | rs10774037 | 9.43E-03 | 0.289872065 |
| 12 | rs2238043  | 12 | rs4765679  | 9.19E-03 | 0.296572757 |
| 3  | rs3774491  | 7  | rs1862124  | 9.36E-03 | 0.296841358 |
| 3  | rs898416   | 7  | rs2097915  | 2.46E-03 | 0.298909919 |
| 7  | rs10215394 | 12 | rs1558322  | 2.55E-03 | 0.300653233 |
| 3  | rs3774491  | 7  | rs2097915  | 2.90E-03 | 0.300745492 |
| 3  | rs1380606  | 7  | rs2097915  | 2.73E-03 | 0.301053216 |
| 12 | rs2239015  | 12 | rs876503   | 9.21E-03 | 0.306296311 |
| 7  | rs17821377 | 7  | rs12531682 | 6.62E-03 | 0.307020608 |
| 7  | rs17832393 | 7  | rs12531682 | 2.99E-03 | 0.309367703 |
| 3  | rs979220   | 3  | rs2612015  | 6.84E-03 | 0.320558136 |
| 7  | rs10486945 | 7  | rs2368021  | 7.55E-03 | 0.321774659 |
| 7  | rs2237511  | 7  | rs12669716 | 6.46E-03 | 0.326659288 |

|    |            |    |            |          |             |
|----|------------|----|------------|----------|-------------|
| 3  | rs9841978  | 12 | rs3794299  | 3.58E-03 | 0.335513305 |
| 7  | rs7800392  | 7  | rs978326   | 2.96E-03 | 0.336404975 |
| 7  | rs929381   | 7  | rs13245449 | 6.29E-03 | 0.337751107 |
| 12 | rs2370411  | 12 | rs1860091  | 5.85E-03 | 0.350911839 |
| 7  | rs12670011 | 7  | rs42237    | 5.30E-03 | 0.352730395 |
| 7  | rs1157097  | 7  | rs2368021  | 5.44E-03 | 0.360494574 |
| 1  | rs3767511  | 7  | rs10257186 | 9.84E-03 | 0.375261959 |
| 3  | rs9841978  | 7  | rs12707486 | 2.01E-03 | 0.380733888 |
| 7  | rs7800392  | 7  | rs12531682 | 7.47E-03 | 0.390770872 |
| 3  | rs9841978  | 7  | rs13245449 | 3.11E-03 | 0.396388449 |
| 12 | rs10848628 | 12 | rs11062192 | 2.67E-03 | 0.398505491 |
| 3  | rs979220   | 3  | rs2029331  | 6.75E-03 | 0.398842329 |
| 12 | rs1558322  | 12 | rs2239074  | 1.98E-03 | 0.402133277 |
| 3  | rs12487452 | 7  | rs10808299 | 9.58E-03 | 0.409306152 |
| 3  | rs2359133  | 7  | rs10272958 | 1.22E-03 | 0.410335899 |
| 7  | rs10272958 | 12 | rs4765914  | 6.98E-03 | 0.41389273  |
| 7  | rs1859543  | 12 | rs2239079  | 3.29E-03 | 0.41988526  |
| 7  | rs17180597 | 7  | rs10215394 | 3.51E-03 | 0.421761041 |
| 7  | rs10272958 | 12 | rs10774037 | 4.14E-03 | 0.422948552 |
| 3  | rs3774473  | 7  | rs2097915  | 4.37E-03 | 0.422955824 |
| 7  | rs17832393 | 7  | rs7781562  | 2.59E-03 | 0.434141699 |
| 7  | rs3801767  | 12 | rs3819526  | 9.15E-03 | 0.446002807 |
| 7  | rs3823920  | 12 | rs1034936  | 4.62E-03 | 0.446536427 |
| 7  | rs17821377 | 7  | rs7781562  | 6.43E-03 | 0.453904981 |
| 1  | rs10920106 | 12 | rs10848608 | 8.55E-03 | 0.467373906 |
| 7  | rs12669716 | 12 | rs10774037 | 9.01E-03 | 0.47944616  |
| 7  | rs12669716 | 7  | rs10215394 | 2.18E-03 | 0.482637031 |
| 3  | rs2359133  | 7  | rs3801740  | 6.43E-04 | 0.486156441 |
| 7  | rs929381   | 7  | rs12669716 | 2.47E-03 | 0.494776828 |
| 3  | rs6763245  | 7  | rs1862124  | 7.90E-03 | 0.499236844 |
| 12 | rs1558322  | 12 | rs2370515  | 1.75E-03 | 0.50301869  |
| 12 | rs7302743  | 12 | rs876503   | 5.84E-03 | 0.504838961 |
| 7  | rs10231240 | 7  | rs6977982  | 3.04E-03 | 0.50877105  |
| 7  | rs12533606 | 12 | rs2370413  | 8.10E-03 | 0.509620006 |
| 7  | rs12533606 | 12 | rs10774037 | 2.15E-03 | 0.514596723 |
| 3  | rs2612015  | 7  | rs3823920  | 9.97E-03 | 0.51754947  |
| 7  | rs17832393 | 7  | rs42049    | 8.57E-03 | 0.524852858 |
| 3  | rs9841978  | 7  | rs2368021  | 3.36E-03 | 0.526829991 |
| 1  | rs3767499  | 7  | rs258728   | 1.24E-03 | 0.535533845 |
| 7  | rs12533606 | 12 | rs4765914  | 3.69E-03 | 0.537647185 |
| 12 | rs2887780  | 12 | rs1122784  | 6.82E-03 | 0.537696339 |
| 7  | rs10257186 | 7  | rs12533606 | 8.65E-03 | 0.545077296 |
| 1  | rs3767511  | 7  | rs10808299 | 6.23E-03 | 0.547810639 |
| 7  | rs10808299 | 12 | rs4765882  | 8.74E-03 | 0.551490322 |

|    |            |    |            |          |             |
|----|------------|----|------------|----------|-------------|
| 7  | rs929381   | 7  | rs2368021  | 8.13E-03 | 0.555962482 |
| 12 | rs10848635 | 12 | rs11062192 | 3.54E-03 | 0.55873139  |
| 7  | rs37118    | 7  | rs6977982  | 5.77E-03 | 0.559104058 |
| 7  | rs17832393 | 7  | rs42489    | 9.50E-03 | 0.559489535 |
| 7  | rs37119    | 7  | rs6977982  | 4.31E-03 | 0.569095785 |
| 3  | rs7649275  | 12 | rs4765679  | 6.20E-03 | 0.573680774 |
| 3  | rs2359133  | 7  | rs3801742  | 4.65E-04 | 0.57880747  |
| 1  | rs6677721  | 7  | rs10808299 | 3.71E-03 | 0.579129439 |
| 7  | rs12670011 | 12 | rs2370413  | 5.98E-03 | 0.586360563 |
| 1  | rs12737822 | 3  | rs6794085  | 4.55E-03 | 0.601718191 |
| 7  | rs17832393 | 7  | rs42342    | 9.56E-03 | 0.601986563 |
| 1  | rs6677721  | 7  | rs11514983 | 9.83E-03 | 0.603658602 |
| 1  | rs4915475  | 7  | rs1862124  | 8.24E-03 | 0.609514713 |
| 12 | rs12423277 | 12 | rs11062192 | 7.46E-03 | 0.609822772 |
| 3  | rs3774589  | 7  | rs6975142  | 9.91E-03 | 0.612962765 |
| 7  | rs12670011 | 12 | rs1006737  | 8.54E-03 | 0.613465651 |
| 7  | rs10257186 | 7  | rs12670011 | 8.61E-03 | 0.619297132 |
| 12 | rs10848632 | 12 | rs11062192 | 1.57E-03 | 0.623409189 |
| 7  | rs7800392  | 7  | rs7781562  | 6.59E-03 | 0.634552096 |
| 7  | rs12670011 | 12 | rs10774037 | 2.21E-03 | 0.640902073 |
| 3  | rs2633727  | 12 | rs4765679  | 6.66E-03 | 0.641319582 |
| 7  | rs12670011 | 12 | rs4765914  | 3.80E-03 | 0.642755395 |
| 12 | rs10848633 | 12 | rs11062192 | 2.57E-03 | 0.653744309 |
| 3  | rs3774581  | 7  | rs3801742  | 3.75E-03 | 0.655632293 |
| 7  | rs3801712  | 12 | rs758116   | 1.16E-03 | 0.657850142 |
| 3  | rs6803827  | 7  | rs1862124  | 9.75E-03 | 0.66559014  |
| 12 | rs10848636 | 12 | rs11062192 | 2.93E-03 | 0.666556614 |
| 12 | rs10848634 | 12 | rs11062192 | 2.46E-03 | 0.66917972  |
| 7  | rs12670011 | 12 | rs4765905  | 6.16E-03 | 0.674956192 |
| 12 | rs4765902  | 12 | rs11062192 | 2.45E-03 | 0.678716292 |
| 12 | rs2887780  | 12 | rs2370515  | 8.75E-03 | 0.681964299 |
| 12 | rs2238043  | 12 | rs10848634 | 8.71E-03 | 0.683687879 |
| 7  | rs17180597 | 12 | rs10774037 | 5.36E-03 | 0.686045445 |
| 12 | rs4765914  | 12 | rs11062192 | 5.88E-03 | 0.687713833 |
| 3  | rs3821865  | 7  | rs6975142  | 8.48E-03 | 0.692805355 |
| 12 | rs2238043  | 12 | rs10848628 | 9.34E-03 | 0.694458923 |
| 12 | rs4765680  | 12 | rs929492   | 3.69E-03 | 0.69843513  |
| 7  | rs38545    | 12 | rs758116   | 4.44E-03 | 0.70798713  |
| 1  | rs4915475  | 7  | rs3801767  | 7.67E-03 | 0.711690836 |
| 12 | rs2238054  | 12 | rs11062192 | 2.07E-03 | 0.712460163 |
| 7  | rs17180597 | 12 | rs4765914  | 8.88E-03 | 0.713045847 |
| 7  | rs12533606 | 7  | rs10215394 | 7.77E-03 | 0.717301246 |
| 7  | rs1859543  | 12 | rs758116   | 7.64E-05 | 0.717675319 |
| 3  | rs3774581  | 7  | rs3801740  | 4.97E-03 | 0.721319488 |

|    |            |    |            |          |             |
|----|------------|----|------------|----------|-------------|
| 12 | rs2238043  | 12 | rs10848633 | 7.86E-03 | 0.733339736 |
| 3  | rs2077167  | 7  | rs38564    | 1.34E-03 | 0.739958363 |
| 12 | rs11062156 | 12 | rs11062192 | 2.38E-03 | 0.740026333 |
| 1  | rs6677721  | 7  | rs929351   | 7.14E-03 | 0.742496576 |
| 7  | rs1862124  | 7  | rs258665   | 9.24E-03 | 0.743507741 |
| 7  | rs12673314 | 12 | rs10735008 | 3.46E-03 | 0.747887702 |
| 1  | rs6689533  | 3  | rs3774473  | 1.11E-03 | 0.74864007  |
| 12 | rs2238043  | 12 | rs2238054  | 4.37E-03 | 0.755631159 |
| 3  | rs12487452 | 7  | rs42237    | 4.29E-03 | 0.764395759 |
| 3  | rs11719179 | 7  | rs3823920  | 3.74E-03 | 0.76766838  |
| 12 | rs2238043  | 12 | rs4765902  | 7.93E-03 | 0.768252861 |
| 12 | rs2238043  | 12 | rs10848636 | 8.46E-03 | 0.769595155 |
| 12 | rs10774037 | 12 | rs11062192 | 9.08E-03 | 0.772684856 |
| 7  | rs3779449  | 12 | rs10735008 | 4.88E-03 | 0.774801333 |
| 7  | rs12673314 | 12 | rs4765678  | 9.32E-03 | 0.781950153 |
| 3  | rs3774491  | 7  | rs38564    | 3.24E-03 | 0.782845797 |
| 3  | rs9841978  | 7  | rs42237    | 2.14E-03 | 0.790760504 |
| 3  | rs979220   | 7  | rs10215394 | 7.42E-03 | 0.799878719 |
| 3  | rs7649275  | 12 | rs4765933  | 5.70E-03 | 0.806402587 |
| 12 | rs2239030  | 12 | rs11062192 | 4.27E-03 | 0.806896959 |
| 12 | rs1558322  | 12 | rs1122784  | 1.23E-03 | 0.80889598  |
| 12 | rs1076346  | 12 | rs2239109  | 6.25E-03 | 0.816911277 |
| 7  | rs4732421  | 12 | rs1108385  | 9.68E-03 | 0.824925274 |
| 3  | rs898416   | 7  | rs38564    | 3.13E-03 | 0.825209009 |
| 3  | rs2029331  | 7  | rs3823920  | 9.34E-03 | 0.825725914 |
| 12 | rs2239074  | 12 | rs929492   | 2.06E-03 | 0.826200505 |
| 3  | rs10490772 | 12 | rs1558322  | 7.88E-03 | 0.826362166 |
| 7  | rs12670011 | 7  | rs10215394 | 9.73E-03 | 0.833303834 |
| 7  | rs12673314 | 12 | rs2283308  | 5.19E-03 | 0.83854644  |
| 1  | rs10920106 | 12 | rs740416   | 3.82E-03 | 0.841975351 |
| 7  | rs12673314 | 12 | rs2239075  | 7.19E-03 | 0.844060157 |
| 3  | rs898415   | 7  | rs38564    | 3.29E-03 | 0.847515673 |
| 12 | rs2238043  | 12 | rs11062156 | 7.33E-03 | 0.854056351 |
| 12 | rs11062225 | 12 | rs4765678  | 2.76E-03 | 0.854815824 |
| 7  | rs879660   | 7  | rs6977982  | 4.11E-03 | 0.859443037 |
| 1  | rs3767511  | 7  | rs12707486 | 5.45E-03 | 0.865671632 |
| 7  | rs3779449  | 12 | rs2283308  | 8.04E-03 | 0.869454985 |
| 1  | rs3767511  | 7  | rs2368021  | 4.80E-03 | 0.87039846  |
| 7  | rs3779449  | 12 | rs2239075  | 9.99E-03 | 0.871624872 |
| 3  | rs12487452 | 7  | rs6975142  | 1.06E-05 | 0.875693982 |
| 3  | rs2359133  | 7  | rs12533606 | 9.85E-03 | 0.8791506   |
| 3  | rs13076366 | 7  | rs3823920  | 4.26E-03 | 0.880854447 |
| 3  | rs2633727  | 12 | rs4765933  | 6.11E-03 | 0.883514561 |
| 7  | rs11514983 | 12 | rs11062225 | 4.97E-03 | 0.885304591 |



|    |            |    |            |          |             |
|----|------------|----|------------|----------|-------------|
| 3  | rs1380606  | 7  | rs38564    | 3.04E-03 | 0.891589224 |
| 12 | rs11062225 | 12 | rs10735008 | 3.52E-03 | 0.898706239 |
| 12 | rs11062225 | 12 | rs2239075  | 3.24E-03 | 0.926445719 |
| 1  | rs10494827 | 7  | rs879660   | 7.64E-03 | 0.931296328 |
| 12 | rs2370411  | 12 | rs11062156 | 8.73E-03 | 0.948979368 |
| 3  | rs3774530  | 7  | rs2097915  | 6.42E-03 | 0.955642899 |
| 12 | rs2370411  | 12 | rs10848633 | 9.23E-03 | 0.956520935 |
| 1  | rs3767511  | 7  | rs13245449 | 4.96E-03 | 0.95915965  |
| 12 | rs2370411  | 12 | rs2238054  | 5.30E-03 | 0.975115643 |
| 7  | rs6977982  | 12 | rs11062192 | 7.26E-03 | 0.985732676 |
| 1  | rs10920115 | 12 | rs4765663  | 6.55E-03 | 0.988844863 |
| 3  | rs3774570  | 7  | rs6975142  | 9.28E-03 | 0.988977904 |
| 12 | rs2238043  | 12 | rs10848635 | 7.48E-03 | 0.994496303 |
| 1  | rs4915475  | 7  | rs258728   | 4.58E-03 | 0.99476414  |
| 7  | rs17832393 | 7  | rs2237524  | 1.25E-03 | NA          |
| 7  | rs2368021  | 17 | rs16537    | 1.53E-03 | NA          |
| 12 | rs1558322  | 12 | rs11831085 | 1.90E-03 | NA          |
| 7  | rs929381   | 7  | rs17264194 | 2.15E-03 | NA          |
| 12 | rs12422554 | 12 | rs11062192 | 2.22E-03 | NA          |
| 7  | rs17821377 | 7  | rs2237524  | 3.20E-03 | NA          |
| 7  | rs7800392  | 7  | rs2237524  | 3.42E-03 | NA          |
| 7  | rs17264194 | 12 | rs10774037 | 4.11E-03 | NA          |
| 12 | rs2239062  | 17 | rs16537    | 4.66E-03 | NA          |
| 7  | rs17264194 | 12 | rs4765914  | 5.36E-03 | NA          |
| 7  | rs17264194 | 7  | rs10215394 | 7.08E-03 | NA          |
| 7  | rs17264194 | 12 | rs4765905  | 7.56E-03 | NA          |
| 3  | rs979220   | 12 | rs2238081  | 8.26E-03 | NA          |
| 3  | rs2359133  | 7  | rs17264194 | 8.62E-03 | NA          |
| 7  | rs258664   | 12 | rs11062192 | 8.77E-03 | NA          |
| 12 | rs2370411  | 12 | rs12422554 | 8.77E-03 | NA          |
| 3  | rs7617553  | 7  | rs17264194 | 9.43E-03 | NA          |
| 7  | rs2097915  | 7  | rs17264194 | 9.62E-03 | NA          |
| 7  | rs4732421  | 12 | rs2238081  | 9.78E-03 | NA          |

**Table S5.** The top 1000 interaction results out of all possible SNP-SNP pair-wise interactions in the WTCCC data and the corresponding interaction p-values in the GAIN data.

| chr1 | snp1       | chr2 | snp2       | p_WTCCC_BD | p_GAIN_BD   |
|------|------------|------|------------|------------|-------------|
| 5    | rs10066522 | 11   | rs11234157 | 1.24E-07   | NA          |
| 5    | rs10066522 | 11   | rs11234194 | 1.05E-07   | NA          |
| 5    | rs10075717 | 8    | rs10086541 | 1.57E-07   | 0.968452076 |
| 5    | rs10075717 | 8    | rs10097930 | 1.24E-07   | 0.99481837  |
| 5    | rs10075717 | 8    | rs10098453 | 6.81E-08   | 0.95870963  |
| 5    | rs10075717 | 8    | rs11780931 | 7.83E-08   | 0.943622566 |
| 5    | rs10075717 | 8    | rs16917233 | 1.87E-07   | 0.95870963  |
| 5    | rs10075717 | 8    | rs6651272  | 9.22E-08   | 0.957557543 |
| 8    | rs10090871 | 22   | rs4823783  | 5.99E-09   | NA          |
| 8    | rs10098813 | 11   | rs10502207 | 1.46E-08   | 0.647574168 |
| 8    | rs10110893 | 17   | rs1003407  | 9.45E-08   | NA          |
| 8    | rs10110893 | 17   | rs9916038  | 4.56E-08   | 0.318332768 |
| 1    | rs1015082  | 12   | rs11179614 | 5.63E-08   | NA          |
| 2    | rs10176410 | 3    | rs3796224  | 9.33E-08   | 0.101082963 |
| 2    | rs10185293 | 6    | rs1001768  | 4.83E-08   | 0.146521973 |
| 2    | rs10185293 | 6    | rs1254722  | 3.09E-08   | 0.176552105 |
| 2    | rs10192099 | 7    | rs1559012  | 7.13E-08   | 0.519046272 |
| 2    | rs10192190 | 7    | rs1559012  | 5.85E-08   | 0.508133912 |
| 16   | rs1019254  | 20   | rs6075469  | 1.36E-07   | 0.053178816 |
| 2    | rs10208726 | 9    | rs10512067 | 4.37E-08   | 0.100491197 |
| 2    | rs10208726 | 9    | rs10870047 | 1.49E-07   | 0.078825796 |
| 2    | rs10208726 | 9    | rs10870048 | 9.85E-07   | 0.078825796 |
| 2    | rs10208726 | 9    | rs7022404  | 3.65E-08   | 0.071442059 |
| 5    | rs10214278 | 11   | rs1559759  | 2.44E-08   | NA          |
| 3    | rs10222378 | 12   | rs10876321 | 1.96E-08   | 0.18462372  |
| 3    | rs10222378 | 12   | rs1814640  | 3.11E-08   | 0.144315516 |
| 3    | rs10222378 | 12   | rs936955   | 3.31E-08   | 0.166655265 |
| 3    | rs10222378 | 12   | rs936956   | 2.12E-08   | 0.172412921 |
| 7    | rs10247439 | 11   | rs11033408 | 1.22E-07   | NA          |
| 7    | rs10269684 | 14   | rs3861656  | 2.05E-07   | 0.324386443 |
| 7    | rs10269684 | 14   | rs3861658  | 1.96E-07   | 0.298690073 |
| 7    | rs10269684 | 14   | rs4462529  | 1.33E-07   | 0.16418648  |
| 20   | rs1028542  | 21   | rs17003996 | 1.55E-08   | 0.621865963 |
| 2    | rs1030318  | 18   | rs12961730 | 8.16E-09   | 0.407809404 |
| 8    | rs1030420  | 18   | rs664358   | 6.84E-08   | 0.537457286 |
| 10   | rs1041044  | 16   | rs13330883 | 5.04E-08   | NA          |
| 5    | rs10434643 | 5    | rs2351749  | 2.01E-08   | NA          |
| 6    | rs10457128 | 9    | rs12236539 | 2.18E-07   | 0.240852552 |
| 5    | rs10463368 | 14   | rs11625034 | 6.80E-08   | 0.069325003 |
| 5    | rs10476596 | 11   | rs1559759  | 2.94E-08   | 0.232438322 |
| 5    | rs10476597 | 11   | rs1559759  | 2.56E-08   | 0.275912516 |

|    |            |    |            |          |             |
|----|------------|----|------------|----------|-------------|
| 6  | rs10484268 | 18 | rs7236264  | 4.56E-07 | 0.575415358 |
| 7  | rs10486003 | 13 | rs206079   | 1.87E-08 | 0.707183277 |
| 1  | rs10493281 | 8  | rs10098168 | 7.88E-08 | 0.158168865 |
| 1  | rs10493281 | 8  | rs11780228 | 6.39E-08 | 0.202273419 |
| 1  | rs10494030 | 12 | rs11044329 | 8.25E-08 | 0.385257768 |
| 1  | rs10494030 | 12 | rs9669436  | 4.39E-08 | 0.571019706 |
| 2  | rs10495595 | 3  | rs10510620 | 4.04E-08 | 0.718456136 |
| 2  | rs10497467 | 6  | rs7742524  | 6.56E-08 | 0.157645429 |
| 19 | rs10500251 | 20 | rs1012800  | 1.19E-08 | 0.885350048 |
| 13 | rs10507558 | 18 | rs1662298  | 3.44E-08 | 0.54343165  |
| 3  | rs10511345 | 10 | rs3781490  | 2.92E-07 | 0.247196925 |
| 17 | rs10512574 | 20 | rs6135329  | 2.24E-08 | 0.505577071 |
| 3  | rs10513366 | 12 | rs10902528 | 8.89E-09 | 0.440499313 |
| 4  | rs10519535 | 7  | rs10229523 | 1.05E-08 | 0.844531231 |
| 4  | rs10519535 | 7  | rs10241688 | 2.52E-08 | 0.922731276 |
| 4  | rs10519535 | 7  | rs10242164 | 3.34E-08 | 0.940695624 |
| 4  | rs10519535 | 7  | rs10258186 | 3.32E-08 | 0.831484677 |
| 4  | rs10519535 | 7  | rs10270906 | 2.55E-08 | 0.958491951 |
| 4  | rs10519535 | 7  | rs1991771  | 1.24E-07 | 0.860225047 |
| 4  | rs10519535 | 7  | rs2116648  | 1.98E-08 | 0.84250618  |
| 4  | rs10519535 | 7  | rs7782942  | 1.55E-08 | 0.899048637 |
| 6  | rs1060308  | 18 | rs7236264  | 6.93E-07 | 0.497792751 |
| 4  | rs1072776  | 10 | rs12356817 | 1.49E-09 | 0.348914648 |
| 12 | rs10735354 | 18 | rs8088632  | 2.17E-07 | 0.472865341 |
| 1  | rs10736392 | 2  | rs7586500  | 6.52E-08 | NA          |
| 11 | rs10741819 | 20 | rs1964825  | 7.59E-10 | 0.418753568 |
| 11 | rs10741819 | 20 | rs6128541  | 8.10E-09 | 0.331566095 |
| 10 | rs10748657 | 13 | rs1374483  | 1.07E-07 | 0.722304463 |
| 10 | rs10748657 | 13 | rs9569702  | 8.58E-08 | NA          |
| 1  | rs10749805 | 18 | rs12327228 | 7.81E-09 | 0.583837611 |
| 1  | rs10749805 | 18 | rs8095325  | 1.30E-08 | 0.296399669 |
| 1  | rs10753973 | 15 | rs7166908  | 2.70E-08 | 0.163575183 |
| 11 | rs10766570 | 11 | rs12420524 | 5.33E-08 | 0.918444092 |
| 11 | rs10766570 | 11 | rs481926   | 4.23E-08 | 0.948539375 |
| 11 | rs10766631 | 20 | rs1964825  | 2.06E-08 | 0.699583027 |
| 10 | rs10796289 | 15 | rs1402135  | 9.11E-09 | 0.137602079 |
| 9  | rs10810544 | 14 | rs12885683 | 1.77E-08 | 0.107307202 |
| 12 | rs10850875 | 21 | rs12329657 | 2.76E-08 | 0.443441186 |
| 12 | rs10850875 | 21 | rs2822761  | 2.18E-08 | 0.529411152 |
| 12 | rs10850875 | 21 | rs2822765  | 2.16E-08 | 0.346258836 |
| 12 | rs10850875 | 21 | rs9980395  | 2.86E-08 | 0.577537086 |
| 12 | rs10861572 | 21 | rs2150425  | 3.81E-10 | 0.677916352 |
| 1  | rs10864119 | 15 | rs11854579 | 3.06E-09 | 0.531737199 |
| 1  | rs10864119 | 15 | rs7173883  | 2.50E-09 | 0.553017212 |

|    |            |    |            |          |             |
|----|------------|----|------------|----------|-------------|
| 4  | rs10866206 | 6  | rs2235989  | 2.66E-08 | 0.337813412 |
| 1  | rs10881418 | 21 | rs461408   | 1.29E-08 | 0.517162942 |
| 1  | rs10881424 | 21 | rs461408   | 2.13E-08 | 0.791058127 |
| 1  | rs10881425 | 21 | rs461408   | 2.90E-08 | 0.784911782 |
| 10 | rs10882810 | 13 | rs1374483  | 1.11E-07 | 0.867649006 |
| 10 | rs10882810 | 13 | rs9569702  | 8.75E-08 | NA          |
| 10 | rs10884569 | 13 | rs9530249  | 8.20E-08 | NA          |
| 1  | rs10890257 | 14 | rs8014382  | 3.12E-08 | 0.36535202  |
| 11 | rs10892014 | 12 | rs11609114 | 2.13E-08 | 0.499397786 |
| 11 | rs10892014 | 12 | rs11610814 | 3.38E-08 | NA          |
| 11 | rs10892014 | 12 | rs3815670  | 6.87E-09 | 0.402153917 |
| 11 | rs10892015 | 12 | rs11609114 | 3.52E-08 | 0.400635438 |
| 11 | rs10892015 | 12 | rs3815670  | 1.09E-08 | 0.31470137  |
| 11 | rs10896448 | 14 | rs4904477  | 2.43E-09 | 0.987540644 |
| 10 | rs10904206 | 16 | rs17240911 | 1.33E-08 | 0.402296663 |
| 1  | rs10911530 | 11 | rs17509332 | 4.85E-08 | 0.430424043 |
| 1  | rs10912971 | 3  | rs1382270  | 4.70E-08 | 0.507068338 |
| 1  | rs10912971 | 3  | rs1478312  | 2.21E-08 | 0.452082417 |
| 1  | rs10912984 | 3  | rs1382270  | 7.85E-08 | 0.499662564 |
| 1  | rs10912984 | 3  | rs1478312  | 4.38E-08 | 0.445246133 |
| 1  | rs10927994 | 10 | rs10887652 | 4.90E-08 | 0.390914929 |
| 1  | rs10927996 | 10 | rs10887652 | 2.97E-08 | 0.321507124 |
| 3  | rs10935455 | 14 | rs10143962 | 2.40E-07 | 0.73511582  |
| 4  | rs10938163 | 9  | rs4979282  | 1.56E-08 | 0.978109759 |
| 4  | rs10938163 | 9  | rs7046380  | 2.44E-08 | 0.535876557 |
| 5  | rs10942678 | 16 | rs7200764  | 4.77E-08 | 0.584326196 |
| 6  | rs10944560 | 7  | rs219248   | 1.00E-08 | 0.5008425   |
| 6  | rs10944728 | 7  | rs10225488 | 1.74E-07 | 0.433111855 |
| 6  | rs10944728 | 7  | rs10951319 | 9.88E-08 | 0.065324822 |
| 7  | rs10953220 | 11 | rs10501939 | 6.59E-08 | 0.351442572 |
| 9  | rs10963302 | 10 | rs4277057  | 1.58E-09 | 0.950756504 |
| 9  | rs10966833 | 14 | rs17754364 | 9.44E-08 | 0.814913177 |
| 9  | rs10966833 | 14 | rs17827183 | 4.68E-08 | 0.89355703  |
| 9  | rs10966833 | 14 | rs3861638  | 1.81E-08 | 0.71465637  |
| 9  | rs10966833 | 14 | rs3888674  | 4.49E-08 | 0.714011029 |
| 9  | rs10975861 | 12 | rs2909003  | 2.59E-08 | 0.091387804 |
| 10 | rs10995706 | 11 | rs704730   | 7.44E-08 | 0.020638255 |
| 2  | rs1100393  | 8  | rs13264970 | 8.12E-08 | 0.853042054 |
| 10 | rs11012270 | 10 | rs11015150 | 2.45E-08 | 0.31487035  |
| 10 | rs11015150 | 10 | rs11012270 | 2.45E-08 | 0.31487035  |
| 10 | rs11017586 | 16 | rs1974348  | 3.33E-08 | 0.644622783 |
| 10 | rs11017586 | 16 | rs783718   | 8.77E-08 | 0.910551478 |
| 4  | rs1105397  | 4  | rs716948   | 5.52E-08 | 0.254385666 |
| 12 | rs11066737 | 13 | rs1974255  | 9.09E-07 | 0.18228491  |

|    |            |    |            |          |             |
|----|------------|----|------------|----------|-------------|
| 15 | rs11072794 | 18 | rs1943413  | 4.90E-08 | 0.464407463 |
| 17 | rs11077488 | 20 | rs6135329  | 2.29E-08 | 0.554362981 |
| 4  | rs11097753 | 6  | rs10946842 | 3.52E-09 | 0.956889657 |
| 2  | rs11125897 | 12 | rs6489228  | 1.86E-07 | 0.323183322 |
| 3  | rs11128359 | 13 | rs2094186  | 7.16E-08 | 0.637877947 |
| 4  | rs11131763 | 6  | rs2235989  | 2.95E-08 | 0.370704703 |
| 5  | rs11134558 | 6  | rs2504699  | 1.04E-07 | 0.769653748 |
| 6  | rs11155819 | 20 | rs6027742  | 5.69E-08 | 0.039520204 |
| 6  | rs11155819 | 20 | rs6027744  | 3.37E-08 | 0.034147078 |
| 6  | rs11155819 | 20 | rs6071313  | 2.88E-08 | 0.035622993 |
| 6  | rs11155819 | 20 | rs6071344  | 4.04E-08 | 0.98407829  |
| 6  | rs11156311 | 20 | rs2425627  | 2.39E-08 | 0.126899571 |
| 6  | rs11156327 | 20 | rs2425627  | 6.55E-08 | 0.032891022 |
| 1  | rs11161987 | 4  | rs17248887 | 1.35E-06 | 0.181440838 |
| 1  | rs11166268 | 5  | rs17333350 | 4.21E-08 | 0.014593539 |
| 1  | rs11184933 | 21 | rs461408   | 1.32E-08 | 0.757802796 |
| 1  | rs11208830 | 14 | rs2074932  | 3.54E-08 | 0.483639231 |
| 1  | rs11209645 | 2  | rs11123006 | 3.31E-08 | 0.571912841 |
| 11 | rs11230463 | 15 | rs1604335  | 7.30E-08 | 0.534131287 |
| 11 | rs11230463 | 15 | rs17737516 | 6.39E-08 | 0.51079419  |
| 11 | rs11230463 | 15 | rs17737569 | 3.63E-08 | 0.338760827 |
| 11 | rs11230463 | 15 | rs17799275 | 1.08E-07 | 0.630878321 |
| 10 | rs11239271 | 10 | rs531676   | 9.15E-08 | 0.558687191 |
| 7  | rs1125484  | 8  | rs11780203 | 7.85E-08 | 0.724987403 |
| 10 | rs11255241 | 11 | rs10501579 | 1.90E-09 | 0.345305684 |
| 10 | rs11255241 | 11 | rs12290883 | 7.52E-10 | 0.242369637 |
| 10 | rs11255241 | 11 | rs17147761 | 7.87E-10 | 0.34493348  |
| 10 | rs11255241 | 11 | rs1943719  | 6.71E-10 | 0.341790742 |
| 10 | rs11255241 | 11 | rs1943720  | 3.04E-10 | 0.378102681 |
| 10 | rs11255242 | 11 | rs10501579 | 2.05E-09 | 0.337829729 |
| 10 | rs11255242 | 11 | rs12290883 | 8.14E-10 | 0.236833135 |
| 10 | rs11255242 | 11 | rs17147761 | 8.52E-10 | 0.337543132 |
| 10 | rs11255242 | 11 | rs1943719  | 7.27E-10 | 0.334273787 |
| 10 | rs11255242 | 11 | rs1943720  | 3.29E-10 | 0.369886555 |
| 10 | rs11255247 | 11 | rs10501579 | 5.05E-09 | 0.63350567  |
| 10 | rs11255247 | 11 | rs12290883 | 3.07E-09 | 0.507080504 |
| 10 | rs11255247 | 11 | rs17147761 | 3.49E-09 | 0.644466766 |
| 10 | rs11255247 | 11 | rs1943719  | 1.73E-09 | 0.640529903 |
| 10 | rs11255247 | 11 | rs1943720  | 1.26E-09 | 0.769680626 |
| 14 | rs1157500  | 17 | rs6504972  | 6.19E-08 | 0.511213654 |
| 1  | rs11582452 | 8  | rs6987175  | 4.37E-07 | 0.432189763 |
| 8  | rs1159199  | 10 | rs11189420 | 2.80E-07 | NA          |
| 10 | rs11598476 | 21 | rs2837652  | 2.62E-08 | 0.9055878   |
| 10 | rs11599344 | 21 | rs2837652  | 4.23E-08 | 0.973635793 |

|    |            |    |            |          |             |
|----|------------|----|------------|----------|-------------|
| 12 | rs11610896 | 18 | rs1025910  | 7.98E-09 | 0.683964695 |
| 12 | rs11610896 | 18 | rs17747515 | 8.60E-09 | 0.810223766 |
| 12 | rs11610896 | 18 | rs8083764  | 3.50E-08 | 0.804245415 |
| 2  | rs11675757 | 16 | rs10431898 | 1.54E-08 | 0.331377526 |
| 2  | rs11675929 | 7  | rs2214050  | 2.36E-07 | 0.463556078 |
| 2  | rs11679589 | 14 | rs17812034 | 4.29E-09 | 0.631698451 |
| 2  | rs11687710 | 13 | rs7325115  | 1.19E-07 | NA          |
| 3  | rs11714828 | 13 | rs2094186  | 1.22E-07 | 0.224444168 |
| 3  | rs11718390 | 5  | rs1433608  | 2.94E-08 | 0.55177091  |
| 5  | rs11740229 | 16 | rs2941346  | 1.03E-07 | 0.872418473 |
| 8  | rs11787414 | 15 | rs1372613  | 3.23E-09 | 0.730052191 |
| 1  | rs11809428 | 1  | rs4652362  | 1.02E-08 | 0.463406888 |
| 10 | rs11818515 | 21 | rs2837652  | 4.19E-08 | 0.514041658 |
| 11 | rs11823120 | 18 | rs1545723  | 7.39E-08 | NA          |
| 2  | rs11890940 | 5  | rs17431464 | 1.03E-07 | 0.657448619 |
| 2  | rs11898241 | 13 | rs17597090 | 2.77E-08 | 0.693123155 |
| 2  | rs11900660 | 12 | rs1921120  | 3.61E-09 | 0.400717461 |
| 2  | rs11900660 | 12 | rs4628786  | 1.70E-08 | 0.385162572 |
| 3  | rs11919495 | 12 | rs10876321 | 2.49E-08 | 0.196829648 |
| 3  | rs11919495 | 12 | rs936956   | 2.29E-08 | 0.183836428 |
| 4  | rs11947970 | 12 | rs7300980  | 3.18E-08 | 0.701525281 |
| 5  | rs11953164 | 9  | rs10858294 | 9.04E-09 | 0.576646688 |
| 8  | rs11994766 | 13 | rs11619564 | 3.20E-08 | 0.436931328 |
| 1  | rs12022837 | 2  | rs12475055 | 9.27E-09 | 0.483724253 |
| 1  | rs12035312 | 10 | rs1620673  | 1.79E-08 | NA          |
| 1  | rs12038162 | 10 | rs1903904  | 8.62E-08 | 0.221279372 |
| 1  | rs12044560 | 1  | rs4652362  | 5.67E-09 | 0.490927343 |
| 2  | rs12052730 | 10 | rs12764266 | 1.65E-07 | NA          |
| 1  | rs12077113 | 21 | rs461408   | 4.55E-08 | 0.714547937 |
| 7  | rs1207896  | 16 | rs13330825 | 1.92E-08 | 0.26540347  |
| 2  | rs12104998 | 5  | rs10074987 | 8.12E-09 | 0.853808149 |
| 2  | rs12104998 | 5  | rs12656759 | 3.06E-08 | 0.90383954  |
| 2  | rs12104998 | 5  | rs3763116  | 2.28E-08 | 0.923593712 |
| 2  | rs12104998 | 5  | rs440970   | 2.45E-08 | 0.854956569 |
| 9  | rs12115550 | 17 | rs501957   | 1.65E-07 | 0.757659689 |
| 1  | rs12131748 | 5  | rs270654   | 1.38E-08 | 0.731926686 |
| 1  | rs12135162 | 6  | rs1485632  | 4.52E-08 | 0.402833538 |
| 1  | rs12139398 | 20 | rs4814208  | 9.08E-08 | 0.388186923 |
| 1  | rs12139398 | 20 | rs6134830  | 9.77E-08 | 0.477734961 |
| 7  | rs12154666 | 10 | rs1314014  | 2.72E-08 | 0.771438817 |
| 7  | rs12154666 | 10 | rs161279   | 1.26E-07 | 0.751922734 |
| 7  | rs12154666 | 10 | rs3737180  | 9.47E-08 | 0.856526865 |
| 7  | rs12154666 | 10 | rs7894459  | 4.39E-08 | 0.981321065 |
| 6  | rs12195016 | 14 | rs1998055  | 9.83E-08 | NA          |

|    |            |    |            |          |             |
|----|------------|----|------------|----------|-------------|
| 6  | rs12206695 | 19 | rs10402361 | 4.53E-08 | 0.058448391 |
| 6  | rs12206695 | 19 | rs10411165 | 8.51E-08 | 0.121120881 |
| 6  | rs12206695 | 19 | rs7253209  | 6.98E-08 | 0.206298619 |
| 6  | rs12212981 | 14 | rs4904828  | 1.23E-08 | 0.85425883  |
| 10 | rs12219950 | 11 | rs10501579 | 9.92E-09 | 0.464143007 |
| 10 | rs12219950 | 11 | rs12290883 | 2.09E-09 | 0.346098099 |
| 10 | rs12219950 | 11 | rs17147761 | 2.16E-09 | 0.463540428 |
| 10 | rs12219950 | 11 | rs1943719  | 1.85E-09 | 0.460003242 |
| 10 | rs12219950 | 11 | rs1943720  | 8.68E-10 | 0.501068377 |
| 10 | rs12244837 | 11 | rs721238   | 1.52E-07 | 0.010230776 |
| 11 | rs12277667 | 12 | rs10774202 | 2.86E-08 | 0.415871882 |
| 12 | rs1239913  | 12 | rs959926   | 1.80E-08 | 0.857227955 |
| 1  | rs12406698 | 6  | rs11154940 | 4.41E-07 | 0.774649973 |
| 1  | rs12409665 | 4  | rs11940728 | 3.58E-08 | 0.428425904 |
| 1  | rs12409665 | 4  | rs2241482  | 1.69E-09 | 0.787440354 |
| 1  | rs12409665 | 4  | rs3796822  | 2.96E-08 | 0.859202824 |
| 2  | rs12474254 | 8  | rs1567837  | 3.84E-10 | NA          |
| 2  | rs12474254 | 8  | rs7829733  | 1.69E-09 | NA          |
| 2  | rs12474609 | 12 | rs11609678 | 6.31E-08 | 0.10562674  |
| 2  | rs124826   | 8  | rs4872508  | 7.25E-09 | 0.773241488 |
| 4  | rs12509348 | 6  | rs10499127 | 2.16E-08 | 0.889549252 |
| 5  | rs12519214 | 18 | rs12604310 | 1.52E-08 | 0.534559994 |
| 7  | rs12530666 | 9  | rs10958921 | 1.02E-08 | 0.410853104 |
| 2  | rs12612234 | 12 | rs6489228  | 1.22E-07 | 0.301592076 |
| 2  | rs12618884 | 7  | rs38975    | 3.36E-08 | 0.201769941 |
| 3  | rs12635421 | 13 | rs2094186  | 6.96E-08 | 0.699075422 |
| 3  | rs12635722 | 3  | rs1486227  | 1.98E-06 | 0.461757817 |
| 3  | rs12637622 | 22 | rs2105865  | 1.61E-08 | 0.495442358 |
| 4  | rs12645191 | 5  | rs10900805 | 3.89E-08 | 0.414952855 |
| 4  | rs12647157 | 4  | rs382829   | 1.33E-06 | 0.950181261 |
| 4  | rs12647157 | 4  | rs390511   | 1.57E-06 | 0.780104529 |
| 4  | rs12647157 | 4  | rs398688   | 1.64E-06 | 0.73054752  |
| 4  | rs12647157 | 4  | rs425974   | 1.07E-06 | 0.663719193 |
| 5  | rs12653413 | 16 | rs3785349  | 9.65E-09 | 0.329235526 |
| 1  | rs1265883  | 5  | rs2215201  | 3.85E-08 | 0.463714839 |
| 8  | rs12679092 | 11 | rs10502207 | 8.68E-09 | 0.841857614 |
| 8  | rs12679092 | 11 | rs10891872 | 9.17E-09 | 0.902036213 |
| 9  | rs12684405 | 22 | rs2413298  | 1.06E-07 | 0.651200641 |
| 6  | rs1269176  | 12 | rs10880139 | 4.78E-08 | 0.453240253 |
| 6  | rs1269176  | 12 | rs1466790  | 1.48E-07 | 0.800184807 |
| 6  | rs1269176  | 12 | rs7316844  | 4.63E-08 | 0.846871909 |
| 2  | rs12692873 | 7  | rs38975    | 7.72E-08 | 0.372337481 |
| 7  | rs12700545 | 22 | rs3788477  | 3.75E-08 | 0.691945097 |
| 7  | rs12701480 | 10 | rs11018073 | 2.97E-08 | 0.922183384 |

|    |            |    |            |          |             |
|----|------------|----|------------|----------|-------------|
| 7  | rs12701480 | 10 | rs11018078 | 1.55E-08 | 0.862890578 |
| 2  | rs12713377 | 11 | rs7933547  | 1.89E-08 | 0.166424594 |
| 1  | rs12754103 | 6  | rs7761956  | 2.67E-08 | 0.250018571 |
| 11 | rs12799883 | 14 | rs4904477  | 1.25E-09 | 0.975774464 |
| 14 | rs12885749 | 18 | rs626072   | 2.14E-08 | 0.811820594 |
| 2  | rs12996442 | 6  | rs6914480  | 5.45E-08 | 0.961369714 |
| 2  | rs13030671 | 8  | rs13256305 | 3.40E-08 | 0.1522801   |
| 3  | rs13069904 | 10 | rs2420054  | 3.62E-08 | 0.915683652 |
| 3  | rs13079080 | 5  | rs463247   | 3.03E-08 | 0.97360903  |
| 3  | rs13089163 | 9  | rs12352822 | 3.70E-08 | 0.252837255 |
| 4  | rs13127779 | 12 | rs10773648 | 1.45E-07 | 0.575596524 |
| 4  | rs13152233 | 11 | rs7939837  | 3.52E-08 | 0.147916265 |
| 2  | rs1317902  | 6  | rs2317966  | 1.05E-08 | 0.113611488 |
| 5  | rs13180942 | 6  | rs6907666  | 5.47E-09 | 0.19847828  |
| 6  | rs13202942 | 13 | rs10459348 | 6.74E-09 | NA          |
| 6  | rs13202942 | 13 | rs1932913  | 8.10E-09 | 0.279527007 |
| 6  | rs13218960 | 13 | rs10459348 | 1.72E-09 | NA          |
| 6  | rs13218960 | 13 | rs1932913  | 1.79E-09 | 0.201445052 |
| 8  | rs1329798  | 13 | rs9524925  | 2.84E-07 | 0.116369042 |
| 9  | rs1330304  | 18 | rs7228917  | 4.55E-08 | 0.932556735 |
| 10 | rs1336433  | 21 | rs2837652  | 3.16E-08 | 0.897217504 |
| 1  | rs13374397 | 4  | rs2202259  | 1.96E-07 | 0.684033289 |
| 1  | rs13374397 | 4  | rs7677623  | 8.16E-08 | 0.903105677 |
| 1  | rs13376006 | 6  | rs3757142  | 4.92E-07 | 0.189460337 |
| 1  | rs13376006 | 6  | rs3757146  | 4.91E-07 | 0.180295    |
| 1  | rs13376006 | 6  | rs3757148  | 4.66E-07 | 0.184631687 |
| 1  | rs13376006 | 6  | rs6912853  | 9.73E-07 | 0.155676316 |
| 2  | rs13404973 | 16 | rs3743617  | 8.24E-08 | 0.625470975 |
| 2  | rs13405086 | 16 | rs3743617  | 8.88E-08 | 0.579546959 |
| 2  | rs13411119 | 11 | rs7933547  | 8.00E-09 | 0.127747659 |
| 2  | rs13423237 | 8  | rs3815610  | 7.67E-09 | 0.797368761 |
| 5  | rs1345732  | 14 | rs17101094 | 1.48E-07 | 0.430836723 |
| 7  | rs1358390  | 11 | rs3781695  | 5.73E-08 | 0.219762621 |
| 1  | rs1359468  | 16 | rs2923139  | 3.50E-07 | 0.272886163 |
| 7  | rs1360302  | 14 | rs12879200 | 7.73E-09 | 0.218378002 |
| 7  | rs1360302  | 14 | rs4902608  | 1.14E-08 | 0.21894689  |
| 12 | rs1362651  | 19 | rs7359893  | 5.59E-09 | 0.366526858 |
| 2  | rs1367295  | 5  | rs10074987 | 1.77E-08 | 0.953991629 |
| 2  | rs1367295  | 5  | rs12656759 | 6.48E-08 | 0.802100142 |
| 2  | rs1367295  | 5  | rs3763116  | 4.86E-08 | 0.820745996 |
| 2  | rs1367295  | 5  | rs440970   | 5.50E-08 | 0.894187378 |
| 2  | rs1368204  | 7  | rs1559012  | 6.91E-08 | 0.541799326 |
| 3  | rs1381828  | 11 | rs2373550  | 5.77E-08 | 0.635197647 |
| 3  | rs1393360  | 11 | rs2860762  | 1.58E-08 | 0.551921687 |



|    |            |    |            |          |             |
|----|------------|----|------------|----------|-------------|
| 4  | rs1398940  | 10 | rs10884341 | 1.49E-08 | 0.639197164 |
| 4  | rs1398940  | 10 | rs11193042 | 1.02E-08 | 0.663242825 |
| 4  | rs1398940  | 10 | rs12771665 | 7.79E-09 | 0.564315402 |
| 10 | rs1414889  | 21 | rs2837652  | 3.74E-08 | 0.837668827 |
| 6  | rs1417587  | 18 | rs3924849  | 1.94E-07 | 0.048981499 |
| 5  | rs1430420  | 15 | rs10751716 | 1.61E-06 | 0.16921951  |
| 2  | rs1432219  | 11 | rs7108536  | 4.68E-08 | 0.402391397 |
| 10 | rs1435961  | 18 | rs1868710  | 6.52E-08 | 0.673422319 |
| 10 | rs1435961  | 18 | rs921347   | 3.62E-08 | 0.646232339 |
| 3  | rs1440518  | 7  | rs286551   | 1.44E-07 | 0.385303834 |
| 15 | rs1478214  | 22 | rs762907   | 2.53E-08 | NA          |
| 4  | rs1483597  | 10 | rs1361238  | 5.61E-10 | 0.055464758 |
| 1  | rs1487522  | 4  | rs10022745 | 1.12E-08 | NA          |
| 1  | rs1487522  | 4  | rs4524459  | 9.32E-08 | NA          |
| 6  | rs1488     | 12 | rs1049376  | 5.08E-09 | 0.91970269  |
| 6  | rs1488     | 12 | rs12814794 | 5.85E-10 | 0.544106685 |
| 1  | rs1496023  | 11 | rs10160552 | 2.16E-08 | 0.394059752 |
| 1  | rs1496023  | 11 | rs10831093 | 2.16E-08 | 0.370730003 |
| 1  | rs1496023  | 11 | rs7939460  | 3.18E-08 | 0.420685871 |
| 1  | rs1496024  | 4  | rs2955262  | 2.92E-09 | 0.166094311 |
| 1  | rs1496024  | 4  | rs2955267  | 3.98E-09 | 0.227138765 |
| 5  | rs1505080  | 7  | rs7777546  | 5.37E-08 | NA          |
| 1  | rs1514749  | 4  | rs2955262  | 2.12E-08 | 0.1709493   |
| 1  | rs1514749  | 4  | rs2955267  | 7.65E-09 | 0.232306351 |
| 1  | rs1533345  | 1  | rs2282316  | 1.91E-08 | 0.60620769  |
| 1  | rs1533345  | 1  | rs7517197  | 3.52E-08 | 0.598279585 |
| 10 | rs1537635  | 11 | rs10501579 | 6.43E-10 | 0.33337938  |
| 10 | rs1537635  | 11 | rs12290883 | 9.14E-10 | 0.2328048   |
| 10 | rs1537635  | 11 | rs17147761 | 9.57E-10 | 0.333048729 |
| 10 | rs1537635  | 11 | rs1943719  | 4.76E-10 | 0.329949821 |
| 10 | rs1537635  | 11 | rs1943720  | 3.70E-10 | 0.365021947 |
| 2  | rs1540369  | 5  | rs153479   | 3.16E-08 | 0.332308317 |
| 1  | rs1540964  | 16 | rs2923139  | 2.29E-07 | 0.278782648 |
| 2  | rs1542319  | 5  | rs17431464 | 1.35E-07 | 0.575787409 |
| 6  | rs1558592  | 7  | rs10225488 | 1.82E-07 | NA          |
| 1  | rs1572999  | 2  | rs919126   | 9.78E-07 | 0.031964685 |
| 4  | rs1595856  | 13 | rs7336862  | 6.00E-08 | 0.054940738 |
| 10 | rs160052   | 12 | rs7967877  | 2.23E-08 | NA          |
| 8  | rs1647311  | 18 | rs17815006 | 2.29E-08 | 0.276585271 |
| 2  | rs16829125 | 17 | rs12952168 | 7.29E-08 | 0.284426677 |
| 2  | rs16829125 | 17 | rs216481   | 3.34E-08 | 0.246822455 |
| 2  | rs16829125 | 17 | rs216483   | 1.06E-08 | 0.297786079 |
| 2  | rs16829125 | 17 | rs216485   | 8.96E-09 | 0.36219285  |
| 2  | rs16829125 | 17 | rs719601   | 5.84E-08 | 0.206720666 |

|    |            |    |            |          |             |
|----|------------|----|------------|----------|-------------|
| 2  | rs16835141 | 20 | rs2180681  | 3.55E-08 | 0.540067467 |
| 1  | rs16840114 | 10 | rs1248417  | 1.80E-09 | 0.799448387 |
| 1  | rs16840972 | 3  | rs2900641  | 5.95E-08 | 0.506375524 |
| 1  | rs16841924 | 10 | rs7427     | 1.29E-07 | 0.641665548 |
| 2  | rs16855984 | 7  | rs6462200  | 3.71E-08 | NA          |
| 2  | rs16862260 | 20 | rs13041703 | 2.48E-08 | 0.41748458  |
| 5  | rs16869392 | 13 | rs12583307 | 1.12E-08 | 0.575466424 |
| 5  | rs16869392 | 13 | rs1335560  | 2.14E-08 | 0.614484822 |
| 5  | rs16869392 | 13 | rs9523163  | 9.10E-09 | 0.571574943 |
| 5  | rs16869392 | 13 | rs9523164  | 9.87E-09 | 0.451234179 |
| 5  | rs16869392 | 13 | rs9523167  | 9.55E-09 | 0.651932674 |
| 6  | rs16883137 | 18 | rs7236264  | 1.10E-06 | 0.610010464 |
| 6  | rs16883896 | 18 | rs7236264  | 8.41E-07 | 0.774652089 |
| 12 | rs16915276 | 12 | rs2717434  | 6.13E-08 | 0.754912944 |
| 9  | rs16926157 | 15 | rs11857129 | 1.35E-07 | 0.902298736 |
| 15 | rs16940295 | 19 | rs17704999 | 3.84E-08 | 0.1425003   |
| 16 | rs16950703 | 17 | rs2304496  | 5.76E-08 | 0.517042735 |
| 16 | rs16950703 | 17 | rs2304497  | 5.80E-08 | 0.620412559 |
| 2  | rs17013302 | 3  | rs697277   | 7.14E-08 | 0.060230861 |
| 2  | rs17013306 | 3  | rs103323   | 3.09E-07 | 0.021983266 |
| 2  | rs17013306 | 3  | rs697277   | 3.14E-08 | 0.039923779 |
| 2  | rs17013458 | 3  | rs103323   | 6.73E-08 | 0.029372271 |
| 2  | rs17013458 | 3  | rs697277   | 1.99E-08 | 0.052088151 |
| 1  | rs17014930 | 3  | rs2286720  | 3.06E-08 | 0.175483483 |
| 4  | rs17015869 | 11 | rs4421734  | 4.81E-08 | 0.501503895 |
| 2  | rs17038861 | 12 | rs7970014  | 6.87E-09 | 0.674197972 |
| 2  | rs17049535 | 3  | rs517452   | 1.44E-08 | 0.434590365 |
| 2  | rs17049584 | 3  | rs517452   | 7.38E-09 | 0.558622016 |
| 2  | rs17050497 | 18 | rs12961730 | 1.06E-08 | 0.706711221 |
| 9  | rs17060497 | 17 | rs7212458  | 4.83E-09 | 0.042418397 |
| 12 | rs17099254 | 20 | rs2260455  | 8.25E-08 | 0.5524039   |
| 5  | rs17101705 | 14 | rs11625034 | 3.02E-08 | 0.174112104 |
| 1  | rs17103216 | 11 | rs12806493 | 5.05E-09 | 0.559960831 |
| 1  | rs1710807  | 12 | rs11044329 | 8.08E-08 | 0.413275394 |
| 1  | rs1710807  | 12 | rs9669436  | 5.24E-08 | 0.654226493 |
| 5  | rs17116175 | 11 | rs11040220 | 2.72E-09 | 0.149289329 |
| 5  | rs17116175 | 11 | rs4758342  | 8.78E-09 | 0.149145157 |
| 5  | rs17116175 | 11 | rs4758351  | 9.26E-10 | 0.153252007 |
| 7  | rs17133566 | 7  | rs17133677 | 2.60E-06 | 0.605315173 |
| 7  | rs17133677 | 7  | rs17133566 | 2.60E-06 | 0.605315173 |
| 7  | rs17152544 | 7  | rs11760425 | 5.82E-08 | 0.915077977 |
| 5  | rs17154410 | 6  | rs9388860  | 3.60E-08 | 0.157428085 |
| 7  | rs17170840 | 16 | rs2903251  | 1.43E-07 | 0.688717119 |
| 12 | rs17183465 | 13 | rs1974255  | 1.45E-06 | 0.222734263 |

|    |            |    |            |          |             |
|----|------------|----|------------|----------|-------------|
| 5  | rs17184211 | 10 | rs2438673  | 9.54E-10 | 0.347695254 |
| 8  | rs17194239 | 10 | rs11200306 | 1.62E-09 | 0.382102208 |
| 8  | rs17194239 | 10 | rs11200324 | 4.91E-10 | 0.435920355 |
| 8  | rs17194239 | 10 | rs4752630  | 7.18E-10 | 0.779579061 |
| 2  | rs17202701 | 13 | rs1556997  | 2.62E-08 | 0.116687191 |
| 1  | rs1721533  | 4  | rs10031159 | 8.45E-08 | 0.063688997 |
| 2  | rs17226357 | 6  | rs9472719  | 1.43E-07 | 0.843095716 |
| 2  | rs17269126 | 3  | rs517452   | 3.21E-09 | 0.469046715 |
| 11 | rs17383466 | 18 | rs1545723  | 6.70E-08 | 0.386832353 |
| 5  | rs17386596 | 10 | rs7916063  | 7.89E-08 | 0.535664514 |
| 2  | rs17395091 | 5  | rs1023681  | 2.88E-08 | 0.227937557 |
| 5  | rs174047   | 6  | rs17631240 | 2.46E-08 | 0.21268596  |
| 2  | rs17413382 | 5  | rs9291942  | 1.33E-08 | 0.017934163 |
| 2  | rs17413382 | 5  | rs9291943  | 1.60E-08 | NA          |
| 2  | rs17460149 | 3  | rs155826   | 4.86E-07 | 0.678592122 |
| 12 | rs17465265 | 18 | rs11659484 | 3.34E-08 | 0.721782733 |
| 12 | rs17465286 | 18 | rs11659484 | 5.47E-08 | 0.693095749 |
| 11 | rs17465787 | 18 | rs1545723  | 3.60E-08 | 0.415287305 |
| 1  | rs17509537 | 18 | rs11872518 | 4.78E-09 | 0.254268081 |
| 2  | rs17521078 | 5  | rs440970   | 6.40E-08 | 0.90337574  |
| 4  | rs17574213 | 18 | rs561802   | 1.71E-07 | 0.546187064 |
| 1  | rs17606320 | 11 | rs10893354 | 6.06E-08 | 0.968713394 |
| 4  | rs17608635 | 20 | rs13039010 | 1.52E-08 | 0.098680294 |
| 6  | rs17629180 | 18 | rs7236264  | 4.38E-07 | 0.546208119 |
| 8  | rs17640016 | 14 | rs1043831  | 4.02E-08 | 0.489609363 |
| 8  | rs17640016 | 14 | rs11158709 | 4.35E-09 | 0.37352987  |
| 8  | rs17640016 | 14 | rs11628094 | 5.67E-09 | 0.439090893 |
| 8  | rs17640016 | 14 | rs12884447 | 1.64E-08 | 0.382388449 |
| 11 | rs17664162 | 16 | rs17670231 | 2.36E-08 | 0.5706455   |
| 11 | rs17664162 | 16 | rs4411516  | 1.60E-07 | 0.838273399 |
| 3  | rs17664833 | 4  | rs17504069 | 3.52E-07 | 0.368129788 |
| 14 | rs1767390  | 19 | rs2682594  | 1.24E-07 | NA          |
| 7  | rs17689617 | 19 | rs17829934 | 4.28E-09 | 0.259288178 |
| 7  | rs17689617 | 19 | rs8105122  | 3.68E-10 | 0.138542538 |
| 6  | rs17696583 | 18 | rs7236264  | 6.40E-07 | 0.576285083 |
| 4  | rs17696651 | 5  | rs295665   | 9.81E-09 | 0.577757908 |
| 4  | rs17696651 | 5  | rs295669   | 1.78E-08 | 0.846878259 |
| 4  | rs17696847 | 5  | rs295665   | 8.08E-09 | 0.380112704 |
| 4  | rs17696847 | 5  | rs295669   | 8.31E-09 | 0.576951038 |
| 1  | rs1770887  | 5  | rs11134625 | 1.20E-07 | 0.264166977 |
| 1  | rs1770887  | 5  | rs1124531  | 1.12E-07 | 0.268168101 |
| 8  | rs17721390 | 10 | rs11010783 | 1.34E-07 | 0.608187126 |
| 8  | rs17721390 | 10 | rs11010839 | 1.18E-08 | 0.388241207 |
| 8  | rs17721390 | 10 | rs11010891 | 2.33E-08 | 0.213908121 |

|    |            |    |            |          |             |
|----|------------|----|------------|----------|-------------|
| 5  | rs17733544 | 5  | rs2351749  | 1.03E-07 | NA          |
| 3  | rs17755675 | 13 | rs2094186  | 1.21E-07 | 0.333220794 |
| 5  | rs17761026 | 6  | rs12180804 | 1.72E-08 | 0.619713533 |
| 5  | rs17761026 | 6  | rs614572   | 8.62E-10 | 0.700124464 |
| 5  | rs17761026 | 6  | rs6458214  | 1.00E-08 | 0.610854887 |
| 5  | rs17761026 | 6  | rs6458215  | 9.63E-09 | 0.636330637 |
| 5  | rs17761026 | 6  | rs647876   | 4.33E-10 | 0.730178851 |
| 5  | rs17761026 | 6  | rs9369270  | 7.81E-10 | 0.730178851 |
| 17 | rs17778087 | 20 | rs6135329  | 7.74E-09 | 0.551496363 |
| 13 | rs17783357 | 22 | rs4431     | 9.20E-08 | 0.233484819 |
| 7  | rs17789420 | 15 | rs4775229  | 4.28E-08 | 0.584384816 |
| 7  | rs17789642 | 15 | rs4775229  | 9.37E-08 | 0.509846635 |
| 2  | rs17808730 | 13 | rs1556997  | 4.70E-08 | 0.11685768  |
| 5  | rs1824780  | 14 | rs10149327 | 9.22E-09 | NA          |
| 5  | rs1824780  | 14 | rs12884090 | 1.10E-08 | 0.407089386 |
| 5  | rs1824780  | 14 | rs9323049  | 2.02E-08 | 0.439351408 |
| 5  | rs1833755  | 7  | rs874599   | 3.03E-08 | 0.446745284 |
| 2  | rs1834134  | 9  | rs3780296  | 1.43E-08 | 0.828758252 |
| 4  | rs1835523  | 12 | rs6538885  | 2.30E-08 | 0.720022905 |
| 4  | rs1835523  | 12 | rs7300980  | 2.32E-08 | 0.746892097 |
| 1  | rs1858650  | 15 | rs7173883  | 7.32E-08 | NA          |
| 7  | rs1859020  | 9  | rs7865494  | 2.21E-08 | 0.047723912 |
| 2  | rs1869009  | 22 | rs5996223  | 7.73E-10 | 0.899228959 |
| 15 | rs1871119  | 22 | rs762907   | 2.04E-08 | NA          |
| 5  | rs1875473  | 6  | rs3846903  | 3.40E-09 | 0.941984032 |
| 9  | rs1886106  | 21 | rs2833679  | 1.32E-08 | NA          |
| 11 | rs1893687  | 15 | rs4924265  | 3.01E-08 | 0.91866234  |
| 11 | rs1893688  | 15 | rs4924265  | 5.67E-08 | 0.809735628 |
| 4  | rs189672   | 10 | rs4387258  | 1.23E-07 | 0.997448572 |
| 9  | rs1929801  | 15 | rs16957963 | 1.86E-07 | 0.488580012 |
| 11 | rs1944488  | 12 | rs10774202 | 1.01E-08 | 0.440276564 |
| 11 | rs1944516  | 12 | rs7135976  | 6.53E-09 | 0.31753295  |
| 11 | rs1945978  | 18 | rs1545723  | 6.41E-08 | 0.350125619 |
| 1  | rs1949338  | 12 | rs11044329 | 7.56E-08 | 0.416959347 |
| 1  | rs1949338  | 12 | rs9669436  | 4.02E-08 | 0.553178792 |
| 3  | rs1965143  | 12 | rs10876321 | 1.83E-08 | 0.17326045  |
| 3  | rs1965143  | 12 | rs1814640  | 2.49E-08 | 0.13487347  |
| 3  | rs1965143  | 12 | rs936955   | 2.64E-08 | 0.156060155 |
| 3  | rs1965143  | 12 | rs936956   | 1.69E-08 | 0.161639585 |
| 10 | rs1970183  | 11 | rs10501579 | 6.11E-10 | 0.33337938  |
| 10 | rs1970183  | 11 | rs12290883 | 8.68E-10 | 0.2328048   |
| 10 | rs1970183  | 11 | rs17147761 | 9.08E-10 | 0.333048729 |
| 10 | rs1970183  | 11 | rs1943719  | 4.52E-10 | 0.329949821 |
| 10 | rs1970183  | 11 | rs1943720  | 3.52E-10 | 0.365021947 |

|    |           |    |            |          |             |
|----|-----------|----|------------|----------|-------------|
| 1  | rs1980892 | 8  | rs1460235  | 6.23E-08 | 0.877327179 |
| 4  | rs1990280 | 22 | rs2871058  | 5.70E-08 | 0.344178179 |
| 1  | rs1995662 | 12 | rs10846514 | 4.49E-06 | 0.508179045 |
| 1  | rs202273  | 10 | rs2796306  | 7.16E-09 | 0.220342795 |
| 1  | rs2026043 | 12 | rs10774295 | 2.82E-08 | 0.048258962 |
| 1  | rs2026043 | 12 | rs1558279  | 1.86E-08 | 0.036400483 |
| 1  | rs2026043 | 12 | rs17178334 | 2.72E-08 | 0.05647424  |
| 1  | rs2036627 | 12 | rs10846514 | 3.28E-06 | 0.546327448 |
| 1  | rs203782  | 10 | rs2796306  | 4.04E-08 | 0.283719224 |
| 6  | rs2086408 | 12 | rs4608114  | 4.11E-08 | 0.645938327 |
| 2  | rs2103226 | 18 | rs8084960  | 4.79E-09 | 0.459570814 |
| 5  | rs210984  | 18 | rs1357162  | 6.94E-09 | 0.243004702 |
| 5  | rs210984  | 18 | rs2685557  | 7.88E-09 | 0.115483517 |
| 6  | rs211589  | 15 | rs1528472  | 6.63E-08 | 0.711452659 |
| 7  | rs2127187 | 16 | rs1833965  | 2.80E-08 | 0.110386659 |
| 5  | rs2128760 | 6  | rs12180804 | 3.47E-08 | 0.609495557 |
| 5  | rs2128760 | 6  | rs6458214  | 2.11E-08 | 0.601745726 |
| 5  | rs2128760 | 6  | rs6458215  | 2.02E-08 | 0.626765448 |
| 5  | rs2128760 | 6  | rs647876   | 2.64E-08 | 0.803443677 |
| 5  | rs2128760 | 6  | rs9369270  | 1.04E-07 | 0.803443677 |
| 7  | rs2159677 | 11 | rs11033408 | 1.03E-07 | 0.957013472 |
| 2  | rs2160980 | 8  | rs4872508  | 1.95E-08 | 0.866165255 |
| 2  | rs2171319 | 5  | rs4957279  | 4.39E-07 | 0.878353501 |
| 14 | rs2208984 | 18 | rs626072   | 3.45E-08 | 0.668268191 |
| 12 | rs2230885 | 19 | rs4011457  | 2.65E-08 | 0.729905312 |
| 3  | rs2276745 | 5  | rs1173481  | 4.64E-08 | 0.593140538 |
| 6  | rs2281462 | 10 | rs17239782 | 5.16E-08 | 0.895184942 |
| 6  | rs2281462 | 10 | rs17241218 | 5.97E-08 | 0.961233166 |
| 6  | rs2281462 | 10 | rs1942002  | 5.21E-08 | NA          |
| 6  | rs2281462 | 10 | rs1942006  | 4.33E-08 | 0.686811347 |
| 6  | rs2281462 | 10 | rs1993183  | 4.20E-08 | 0.889199015 |
| 2  | rs2287110 | 6  | rs10484248 | 1.26E-08 | 0.757730915 |
| 2  | rs2287111 | 6  | rs10484248 | 1.01E-08 | 0.879290104 |
| 2  | rs2318128 | 7  | rs1559012  | 4.41E-08 | 0.538212697 |
| 6  | rs2324476 | 13 | rs9547470  | 3.79E-08 | 0.661143097 |
| 4  | rs2333523 | 6  | rs2235989  | 3.60E-08 | 0.375200152 |
| 4  | rs2333565 | 6  | rs2235989  | 1.93E-08 | 0.371669203 |
| 10 | rs2362962 | 22 | rs2165971  | 7.28E-08 | NA          |
| 1  | rs2367159 | 12 | rs1006705  | 4.11E-08 | 0.611690482 |
| 2  | rs2385635 | 4  | rs7680948  | 2.66E-08 | 0.653927032 |
| 12 | rs2393084 | 18 | rs8097921  | 1.43E-08 | 0.716219003 |
| 1  | rs2405783 | 7  | rs4732148  | 9.89E-09 | 0.26696176  |
| 1  | rs2477201 | 1  | rs4658507  | 2.59E-07 | 0.305095085 |
| 9  | rs2479328 | 12 | rs12228816 | 1.40E-07 | 0.05238008  |

|    |           |    |            |          |             |
|----|-----------|----|------------|----------|-------------|
| 6  | rs2493225 | 16 | rs4782606  | 1.10E-08 | 0.791994592 |
| 1  | rs2496330 | 12 | rs4766314  | 1.29E-08 | 0.289969324 |
| 1  | rs2501909 | 4  | rs17628329 | 5.36E-08 | 0.919723188 |
| 0  | rs2523467 | 13 | rs10507661 | 4.96E-08 | 0.511495409 |
| 2  | rs2542485 | 7  | rs7793374  | 4.04E-08 | 0.808948918 |
| 8  | rs2552122 | 18 | rs16966095 | 2.16E-08 | 0.820984863 |
| 8  | rs2552122 | 18 | rs1786608  | 4.47E-08 | 0.587687054 |
| 8  | rs2552122 | 18 | rs496728   | 3.12E-08 | 0.486553871 |
| 8  | rs2552122 | 18 | rs9963649  | 4.45E-08 | 0.676386803 |
| 5  | rs25914   | 11 | rs10892497 | 1.47E-07 | 0.325427139 |
| 5  | rs25914   | 11 | rs11217583 | 1.75E-07 | 0.149025444 |
| 5  | rs25914   | 11 | rs11217584 | 1.32E-07 | 0.3224901   |
| 3  | rs2616548 | 6  | rs9320486  | 1.58E-08 | 0.148969499 |
| 3  | rs2616548 | 6  | rs9488343  | 2.54E-08 | 0.152258147 |
| 4  | rs2647237 | 15 | rs8034217  | 5.64E-08 | 0.384442129 |
| 2  | rs2670740 | 7  | rs7793374  | 1.54E-08 | 0.934807443 |
| 2  | rs2707253 | 2  | rs707025   | 3.38E-08 | 0.599834523 |
| 2  | rs2707254 | 2  | rs707025   | 2.29E-08 | 0.599834523 |
| 7  | rs2708608 | 21 | rs2262241  | 2.79E-07 | 0.525250943 |
| 4  | rs2712124 | 21 | rs11203155 | 2.09E-08 | 0.665019652 |
| 7  | rs2722396 | 21 | rs10775668 | 1.90E-07 | 0.553340353 |
| 7  | rs2722396 | 21 | rs2838007  | 2.57E-07 | 0.600157357 |
| 15 | rs2732150 | 15 | rs16948771 | 1.11E-07 | 0.883746857 |
| 15 | rs2732150 | 15 | rs4887335  | 3.45E-08 | 0.950664704 |
| 11 | rs274486  | 20 | rs6030014  | 7.55E-08 | 0.838466473 |
| 13 | rs2782516 | 16 | rs8055256  | 1.71E-07 | 0.874698779 |
| 10 | rs2797128 | 16 | rs7204045  | 6.40E-08 | 0.617256832 |
| 9  | rs2810489 | 15 | rs10519041 | 3.63E-09 | 0.036646159 |
| 9  | rs2810489 | 15 | rs12101736 | 3.87E-09 | 0.056190689 |
| 9  | rs2810489 | 15 | rs2507372  | 9.20E-09 | 0.088837225 |
| 6  | rs2817460 | 8  | rs6471898  | 4.02E-08 | 0.328597985 |
| 6  | rs2842461 | 11 | rs11021058 | 7.36E-08 | 0.194027878 |
| 1  | rs2843423 | 3  | rs11708352 | 3.93E-08 | NA          |
| 5  | rs285529  | 10 | rs10999507 | 2.48E-08 | NA          |
| 4  | rs2866422 | 6  | rs10946842 | 4.20E-09 | 0.783604572 |
| 7  | rs2893461 | 7  | rs1860711  | 1.75E-07 | NA          |
| 10 | rs2900934 | 21 | rs2837652  | 3.90E-08 | 0.988632165 |
| 18 | rs29129   | 19 | rs11085908 | 1.63E-08 | 0.381587171 |
| 18 | rs29129   | 19 | rs11666622 | 1.26E-08 | 0.374000396 |
| 18 | rs29129   | 19 | rs3752185  | 3.80E-09 | 0.374000396 |
| 8  | rs2935801 | 10 | rs10829661 | 2.42E-08 | NA          |
| 2  | rs2971883 | 5  | rs10074987 | 2.32E-08 | 0.618549258 |
| 2  | rs2971883 | 5  | rs12656759 | 8.71E-08 | 0.516628292 |
| 2  | rs2971883 | 5  | rs3763116  | 5.71E-08 | 0.507307233 |

|    |           |    |            |          |             |
|----|-----------|----|------------|----------|-------------|
| 8  | rs2979715 | 19 | rs3212752  | 9.88E-08 | 0.963447367 |
| 10 | rs2992278 | 21 | rs363428   | 8.05E-09 | 0.844480739 |
| 10 | rs2992278 | 21 | rs363449   | 7.41E-09 | 0.707622059 |
| 10 | rs3006789 | 21 | rs363428   | 1.29E-08 | 0.822334048 |
| 10 | rs3006789 | 21 | rs363449   | 2.50E-08 | 0.687424006 |
| 10 | rs3006792 | 21 | rs363428   | 2.79E-08 | 0.774378757 |
| 11 | rs3019730 | 12 | rs11609114 | 8.89E-08 | 0.59819212  |
| 11 | rs3019730 | 12 | rs3815670  | 1.98E-08 | 0.492815797 |
| 1  | rs3122922 | 8  | rs12679497 | 2.65E-08 | 0.334339225 |
| 0  | rs3131621 | 8  | rs7825914  | 1.19E-08 | 0.886968957 |
| 2  | rs333852  | 5  | rs658910   | 2.22E-08 | 0.26324358  |
| 20 | rs365516  | 21 | rs17003996 | 6.23E-09 | 0.296613364 |
| 8  | rs367830  | 10 | rs11189420 | 3.09E-07 | 0.889424353 |
| 8  | rs369828  | 10 | rs11189420 | 1.77E-07 | 0.743556818 |
| 2  | rs3732136 | 11 | rs7933547  | 4.57E-09 | 0.104061546 |
| 12 | rs3752702 | 16 | rs11150517 | 5.00E-08 | NA          |
| 2  | rs3769412 | 7  | rs38975    | 5.90E-08 | 0.177629047 |
| 3  | rs3772891 | 20 | rs3091712  | 2.29E-07 | 0.49475079  |
| 2  | rs3791293 | 8  | rs2720810  | 5.37E-08 | 0.518362626 |
| 2  | rs3791815 | 7  | rs2190924  | 2.82E-08 | 0.994798146 |
| 16 | rs3803662 | 20 | rs6053442  | 2.26E-08 | 0.60915138  |
| 7  | rs3808024 | 11 | rs11033408 | 1.21E-07 | 0.65742104  |
| 2  | rs380919  | 8  | rs4872508  | 8.38E-09 | 0.778709948 |
| 2  | rs3816348 | 11 | rs4584542  | 1.71E-07 | NA          |
| 5  | rs3849048 | 10 | rs2297960  | 1.72E-08 | 0.314037233 |
| 8  | rs385396  | 10 | rs11189420 | 2.36E-07 | 0.936066028 |
| 2  | rs3856519 | 18 | rs12961730 | 2.30E-08 | 0.77586716  |
| 3  | rs3856631 | 7  | rs12698421 | 1.30E-07 | 0.233651978 |
| 3  | rs3856631 | 7  | rs12698422 | 3.87E-08 | 0.442712378 |
| 4  | rs3898404 | 10 | rs12221466 | 6.47E-08 | 0.383153696 |
| 1  | rs3906403 | 8  | rs10098168 | 6.28E-08 | 0.146421321 |
| 1  | rs3906403 | 8  | rs11780228 | 5.08E-08 | 0.187864891 |
| 5  | rs3912137 | 19 | rs3745469  | 8.11E-08 | 0.904654096 |
| 1  | rs3912145 | 10 | rs1620673  | 2.12E-08 | 0.945903176 |
| 2  | rs393564  | 4  | rs3821987  | 1.21E-07 | 0.962711375 |
| 3  | rs3936360 | 10 | rs11197611 | 3.83E-08 | 0.155727548 |
| 8  | rs402169  | 10 | rs11189420 | 4.79E-07 | 0.783949568 |
| 2  | rs4027132 | 13 | rs2785497  | 1.96E-08 | 0.075134012 |
| 2  | rs403317  | 10 | rs2253635  | 8.98E-09 | 0.505960105 |
| 3  | rs4055307 | 14 | rs6575209  | 4.97E-09 | 0.924166318 |
| 20 | rs407600  | 21 | rs17003996 | 1.56E-08 | 0.347950392 |
| 5  | rs4077278 | 13 | rs7987608  | 2.34E-08 | 0.913036207 |
| 5  | rs4077278 | 13 | rs9316367  | 5.76E-08 | 0.993102909 |
| 5  | rs4077278 | 13 | rs9526481  | 4.39E-08 | 0.817567098 |

|   |           |    |            |          |             |
|---|-----------|----|------------|----------|-------------|
| 5 | rs4077278 | 13 | rs9568049  | 6.23E-08 | 0.857879723 |
| 5 | rs4077278 | 13 | rs9634680  | 8.04E-08 | 0.858112004 |
| 0 | rs4081552 | 13 | rs10507661 | 8.09E-07 | 0.200321027 |
| 2 | rs4085398 | 4  | rs6837324  | 1.49E-08 | 0.923682637 |
| 3 | rs4123721 | 13 | rs9556795  | 1.91E-08 | 0.201843287 |
| 8 | rs418362  | 10 | rs11189420 | 2.53E-07 | 0.472562326 |
| 8 | rs419874  | 10 | rs11189420 | 2.14E-07 | 0.963301634 |
| 9 | rs4237130 | 11 | rs11220583 | 2.32E-07 | 0.866332103 |
| 6 | rs4245513 | 18 | rs4797619  | 8.62E-09 | NA          |
| 6 | rs425233  | 10 | rs601883   | 7.41E-08 | 0.826608577 |
| 6 | rs4260778 | 20 | rs2425627  | 6.26E-08 | 0.026075269 |
| 1 | rs4268341 | 7  | rs2299257  | 9.14E-08 | 0.116222635 |
| 7 | rs4269482 | 9  | rs10491778 | 6.65E-08 | 0.577471314 |
| 7 | rs4269482 | 9  | rs11791347 | 6.41E-08 | 0.599237475 |
| 4 | rs431836  | 14 | rs10140682 | 1.69E-08 | 0.623939689 |
| 8 | rs432063  | 10 | rs11189420 | 4.00E-07 | 0.831576681 |
| 7 | rs4338000 | 7  | rs1860711  | 2.30E-07 | NA          |
| 4 | rs4345132 | 19 | rs3760905  | 1.61E-07 | 0.751436511 |
| 5 | rs4346787 | 13 | rs7987608  | 1.45E-08 | 0.714205052 |
| 5 | rs4346787 | 13 | rs9568068  | 6.16E-08 | 0.986804711 |
| 4 | rs4356886 | 4  | rs382829   | 3.07E-07 | 0.661452257 |
| 4 | rs4356886 | 4  | rs390511   | 5.63E-07 | 0.579639981 |
| 4 | rs4356886 | 4  | rs398688   | 2.50E-07 | 0.478274501 |
| 4 | rs4356886 | 4  | rs425974   | 1.58E-07 | 0.478790912 |
| 2 | rs438762  | 10 | rs2253635  | 1.27E-08 | 0.628254938 |
| 3 | rs4393847 | 6  | rs2841000  | 8.87E-09 | 0.075236372 |
| 2 | rs440866  | 8  | rs4872508  | 6.67E-09 | 0.48945381  |
| 3 | rs4438643 | 18 | rs11151039 | 1.93E-08 | 0.864102419 |
| 1 | rs4477326 | 22 | rs1569437  | 4.49E-08 | 0.119870249 |
| 1 | rs4477326 | 22 | rs6006733  | 3.29E-08 | 0.133793451 |
| 1 | rs4477326 | 22 | rs6006743  | 4.24E-08 | 0.135159361 |
| 6 | rs4479964 | 17 | rs2447097  | 4.17E-08 | 0.88536154  |
| 1 | rs4491109 | 12 | rs11055259 | 4.96E-08 | 0.7583911   |
| 1 | rs4491109 | 12 | rs11055260 | 3.85E-08 | 0.956216922 |
| 1 | rs4491109 | 12 | rs11055267 | 7.48E-08 | 0.781490428 |
| 1 | rs4491109 | 12 | rs4444170  | 9.97E-08 | 0.618377546 |
| 1 | rs4491109 | 12 | rs4519177  | 2.21E-07 | 0.713249032 |
| 5 | rs4537089 | 12 | rs10774156 | 6.19E-08 | 0.549788489 |
| 5 | rs4537089 | 12 | rs3782752  | 5.36E-08 | 0.701785253 |
| 5 | rs4543289 | 13 | rs7987608  | 1.23E-08 | 0.893664553 |
| 5 | rs4543289 | 13 | rs9526481  | 4.61E-08 | 0.811021833 |
| 5 | rs4543289 | 13 | rs9568049  | 8.12E-08 | 0.852691215 |
| 5 | rs4543289 | 13 | rs9568068  | 2.65E-08 | 0.666811203 |
| 2 | rs4550629 | 5  | rs4533865  | 2.18E-08 | 0.546867902 |



|    |           |    |            |          |             |
|----|-----------|----|------------|----------|-------------|
| 7  | rs4563782 | 21 | rs2837562  | 8.45E-08 | 0.336919762 |
| 7  | rs4563782 | 21 | rs2837563  | 1.74E-07 | 0.311723998 |
| 7  | rs4563782 | 21 | rs714983   | 1.02E-07 | 0.271746161 |
| 3  | rs4635707 | 7  | rs10280028 | 6.60E-08 | NA          |
| 1  | rs4654500 | 7  | rs6463170  | 2.75E-08 | NA          |
| 1  | rs4655313 | 9  | rs567977   | 9.02E-09 | NA          |
| 1  | rs4658690 | 3  | rs11708352 | 1.04E-07 | NA          |
| 1  | rs4661019 | 2  | rs312975   | 2.12E-08 | 0.573701113 |
| 2  | rs4663680 | 7  | rs1559012  | 6.52E-08 | 0.722623195 |
| 2  | rs4669558 | 20 | rs2749951  | 3.01E-08 | 0.025064163 |
| 2  | rs4670589 | 5  | rs12716390 | 2.13E-08 | 0.779636074 |
| 2  | rs4671358 | 18 | rs12961730 | 3.82E-08 | 0.917142938 |
| 2  | rs4671951 | 5  | rs10074987 | 8.07E-09 | 0.953111005 |
| 2  | rs4671951 | 5  | rs12656759 | 3.95E-08 | 0.805714708 |
| 2  | rs4671951 | 5  | rs3763116  | 2.26E-08 | 0.825952893 |
| 2  | rs4671951 | 5  | rs440970   | 4.88E-08 | 0.723244204 |
| 2  | rs4671956 | 5  | rs10074987 | 6.38E-09 | 0.718585418 |
| 2  | rs4671956 | 5  | rs12656759 | 1.63E-08 | 0.924745692 |
| 2  | rs4671956 | 5  | rs3763116  | 1.18E-08 | 0.904287889 |
| 2  | rs4671956 | 5  | rs440970   | 5.47E-08 | 0.879843676 |
| 2  | rs4672331 | 18 | rs12961730 | 8.15E-08 | 0.683882098 |
| 2  | rs4672396 | 18 | rs16949218 | 2.65E-08 | NA          |
| 3  | rs4683968 | 11 | rs10836724 | 2.10E-07 | 0.970918254 |
| 3  | rs4683968 | 11 | rs11034083 | 1.77E-07 | 0.483612578 |
| 3  | rs4684157 | 4  | rs3967768  | 1.68E-08 | 0.720391011 |
| 4  | rs4690418 | 16 | rs7203816  | 1.39E-08 | 0.181093102 |
| 1  | rs469809  | 16 | rs2214437  | 3.86E-08 | 0.346385203 |
| 1  | rs469881  | 16 | rs2214437  | 2.06E-08 | NA          |
| 1  | rs469903  | 16 | rs2214437  | 1.74E-08 | 0.412880941 |
| 11 | rs470437  | 14 | rs1950736  | 1.75E-07 | 0.998554729 |
| 5  | rs4705423 | 12 | rs10774811 | 1.38E-07 | 0.403776477 |
| 6  | rs4711716 | 10 | rs10829802 | 2.20E-09 | 0.369560127 |
| 6  | rs4711716 | 10 | rs11017491 | 1.56E-09 | 0.412801208 |
| 6  | rs4711716 | 10 | rs11017492 | 1.79E-09 | 0.404338307 |
| 9  | rs4741376 | 10 | rs10821729 | 3.64E-08 | 0.830225047 |
| 9  | rs4741376 | 10 | rs10821731 | 2.67E-08 | 0.795701734 |
| 9  | rs4741376 | 10 | rs4582919  | 1.71E-08 | 0.89327801  |
| 9  | rs4741377 | 10 | rs10821729 | 3.23E-08 | 0.824579684 |
| 9  | rs4741377 | 10 | rs10821731 | 2.99E-08 | 0.792868796 |
| 9  | rs4741377 | 10 | rs4582919  | 1.51E-08 | 0.889295183 |
| 9  | rs4741421 | 14 | rs1753430  | 1.63E-07 | 0.728847648 |
| 12 | rs4763208 | 13 | rs17072179 | 2.76E-09 | 0.029585235 |
| 12 | rs4763211 | 13 | rs17072179 | 2.96E-08 | 0.034813246 |
| 12 | rs4765914 | 17 | rs6505444  | 2.61E-08 | 0.379102581 |

|    |           |    |            |          |             |
|----|-----------|----|------------|----------|-------------|
| 12 | rs4766613 | 13 | rs1974255  | 1.39E-06 | 0.21828222  |
| 12 | rs4766866 | 21 | rs12329657 | 2.27E-08 | 0.431280548 |
| 12 | rs4766866 | 21 | rs2822761  | 1.90E-08 | 0.520792849 |
| 12 | rs4766866 | 21 | rs2822765  | 1.79E-08 | 0.33589219  |
| 12 | rs4766866 | 21 | rs9980395  | 2.78E-08 | 0.567364445 |
| 12 | rs4767558 | 18 | rs1025910  | 9.30E-09 | 0.591747144 |
| 12 | rs4767558 | 18 | rs17747515 | 8.36E-09 | 0.678639147 |
| 12 | rs4767558 | 18 | rs8083764  | 4.35E-08 | 0.670423514 |
| 17 | rs4790285 | 18 | rs1943452  | 6.65E-08 | 0.343155639 |
| 17 | rs4790285 | 18 | rs2848791  | 8.21E-08 | 0.116314812 |
| 17 | rs4790285 | 18 | rs2848800  | 5.00E-08 | 0.552132041 |
| 17 | rs4791481 | 19 | rs7253270  | 2.23E-08 | 0.319623492 |
| 1  | rs4844634 | 10 | rs2350106  | 1.56E-08 | 0.28382224  |
| 2  | rs4848692 | 14 | rs17812034 | 9.82E-09 | 0.589281918 |
| 4  | rs4863488 | 12 | rs7974066  | 6.40E-09 | 0.826130371 |
| 6  | rs4895410 | 10 | rs11009830 | 2.60E-08 | 0.300193739 |
| 6  | rs4895410 | 10 | rs2477015  | 2.13E-08 | 0.268170166 |
| 6  | rs4895410 | 10 | rs2489655  | 1.17E-08 | 0.234815403 |
| 6  | rs4895410 | 10 | rs2490806  | 2.21E-08 | 0.295988922 |
| 6  | rs4895410 | 10 | rs2496718  | 1.97E-08 | 0.255626741 |
| 6  | rs4897095 | 7  | rs10486524 | 3.47E-08 | 0.436705699 |
| 6  | rs4897096 | 7  | rs10486524 | 2.36E-08 | 0.488137585 |
| 1  | rs4907093 | 9  | rs16918137 | 2.51E-08 | NA          |
| 1  | rs4908131 | 2  | rs7562287  | 2.08E-07 | 0.753180729 |
| 1  | rs4912230 | 22 | rs6006733  | 5.22E-08 | 0.142848929 |
| 1  | rs4915129 | 21 | rs461408   | 2.08E-08 | 0.616848844 |
| 1  | rs4920408 | 6  | rs2475499  | 3.46E-08 | 0.792866548 |
| 2  | rs492190  | 3  | rs9879137  | 1.56E-07 | 0.077827518 |
| 5  | rs4957534 | 10 | rs17819557 | 1.55E-07 | 0.536189197 |
| 5  | rs4957534 | 10 | rs7916063  | 9.74E-08 | 0.372982297 |
| 5  | rs4957693 | 10 | rs17819557 | 1.02E-07 | 0.508598828 |
| 5  | rs4957693 | 10 | rs4275540  | 1.03E-07 | 0.364228924 |
| 5  | rs4957693 | 10 | rs7916063  | 5.06E-08 | 0.356531066 |
| 6  | rs4959698 | 6  | rs17073267 | 3.88E-08 | 0.897204032 |
| 6  | rs4959698 | 6  | rs17073273 | 2.56E-08 | 0.79995308  |
| 16 | rs4967664 | 17 | rs7207501  | 2.45E-07 | NA          |
| 3  | rs5009838 | 21 | rs2824799  | 3.12E-08 | 0.094502072 |
| 3  | rs5009838 | 21 | rs2824800  | 3.23E-08 | 0.088291675 |
| 0  | rs532419  | 10 | rs12572911 | 6.78E-08 | 0.179366053 |
| 0  | rs532419  | 10 | rs7918923  | 1.37E-07 | 0.082718061 |
| 1  | rs553427  | 21 | rs2827975  | 2.15E-08 | 0.641366007 |
| 1  | rs553427  | 21 | rs2827976  | 4.17E-08 | 0.516675048 |
| 1  | rs553427  | 21 | rs2827984  | 2.36E-08 | 0.735887298 |
| 1  | rs553427  | 21 | rs7279655  | 1.74E-08 | 0.647229553 |

|    |           |    |            |          |             |
|----|-----------|----|------------|----------|-------------|
| 1  | rs553427  | 21 | rs9305170  | 4.36E-08 | 0.503191948 |
| 4  | rs560164  | 5  | rs17693758 | 2.02E-09 | 0.182877311 |
| 6  | rs573301  | 11 | rs1516622  | 1.44E-07 | 0.062477098 |
| 6  | rs573301  | 11 | rs7946494  | 8.39E-08 | 0.022910701 |
| 1  | rs574053  | 2  | rs12469678 | 1.53E-08 | 0.869599513 |
| 0  | rs580771  | 22 | rs2748341  | 1.89E-08 | 0.359986661 |
| 0  | rs580771  | 22 | rs885792   | 7.72E-09 | 0.3877545   |
| 1  | rs586609  | 12 | rs10774295 | 5.05E-08 | 0.103945706 |
| 1  | rs586609  | 12 | rs1558279  | 3.34E-08 | 0.068311963 |
| 1  | rs586609  | 12 | rs17178334 | 2.96E-08 | 0.120264299 |
| 1  | rs587527  | 12 | rs10841066 | 7.89E-08 | 0.344693744 |
| 1  | rs587910  | 10 | rs1620673  | 3.21E-08 | 0.979531967 |
| 1  | rs624761  | 2  | rs918808   | 2.78E-09 | 0.309174201 |
| 1  | rs636561  | 10 | rs1620673  | 1.52E-08 | 0.98965817  |
| 11 | rs637149  | 12 | rs764065   | 1.09E-08 | 0.313961565 |
| 1  | rs640874  | 5  | rs17548653 | 5.86E-07 | 0.155433894 |
| 1  | rs6427119 | 10 | rs2796306  | 1.71E-08 | 0.804720239 |
| 1  | rs6429214 | 14 | rs11158758 | 6.12E-09 | 0.962598946 |
| 2  | rs6432078 | 7  | rs6462200  | 1.21E-08 | NA          |
| 2  | rs6436834 | 5  | rs1015586  | 2.27E-09 | 0.484742034 |
| 3  | rs6439167 | 10 | rs10995412 | 3.61E-09 | 0.970808076 |
| 3  | rs6439168 | 10 | rs10995412 | 2.42E-09 | 0.960130946 |
| 3  | rs6445058 | 15 | rs16944923 | 4.75E-08 | 0.422062823 |
| 5  | rs6451758 | 15 | rs12595699 | 1.92E-08 | 0.404394644 |
| 8  | rs6472735 | 18 | rs17436811 | 1.26E-08 | 0.810751626 |
| 11 | rs647837  | 14 | rs1950736  | 2.89E-07 | 0.866649942 |
| 13 | rs6492597 | 18 | rs2217127  | 5.35E-08 | 0.925941394 |
| 1  | rs652953  | 2  | rs12475055 | 3.58E-08 | NA          |
| 2  | rs6544643 | 8  | rs3019350  | 7.22E-09 | 0.663109352 |
| 2  | rs6546473 | 9  | rs877932   | 6.34E-08 | NA          |
| 3  | rs6549953 | 7  | rs286551   | 7.72E-08 | 0.273525647 |
| 5  | rs6556401 | 13 | rs493248   | 2.25E-08 | 0.424225759 |
| 8  | rs6558292 | 16 | rs9929440  | 3.29E-09 | 0.533957691 |
| 10 | rs6585089 | 21 | rs2837652  | 3.50E-08 | 0.897217504 |
| 5  | rs6596384 | 5  | rs17745927 | 5.69E-09 | 0.708603976 |
| 1  | rs6665381 | 10 | rs11248424 | 1.90E-07 | 0.359110794 |
| 1  | rs6669318 | 1  | rs947377   | 4.20E-05 | 0.750131407 |
| 1  | rs6677110 | 10 | rs7910788  | 6.73E-08 | 0.816831971 |
| 1  | rs6684867 | 22 | rs1569437  | 5.41E-08 | 0.10686877  |
| 1  | rs6684867 | 22 | rs6006733  | 3.94E-08 | 0.134100014 |
| 1  | rs6684867 | 22 | rs6006743  | 4.43E-08 | 0.1215825   |
| 1  | rs6691889 | 10 | rs10887652 | 1.57E-08 | 0.504435245 |
| 1  | rs6695016 | 4  | rs10031159 | 7.89E-08 | 0.062477275 |
| 1  | rs6701066 | 13 | rs9526614  | 1.81E-08 | 0.420144365 |

|   |           |    |            |          |             |
|---|-----------|----|------------|----------|-------------|
| 2 | rs6730863 | 21 | rs8129180  | 2.33E-08 | 0.986007699 |
| 2 | rs6732447 | 7  | rs1559012  | 5.78E-08 | 0.588977153 |
| 2 | rs6735427 | 17 | rs1117059  | 5.93E-08 | 0.290152944 |
| 2 | rs6735427 | 17 | rs973630   | 5.51E-08 | 0.338443764 |
| 2 | rs6737351 | 7  | rs1559012  | 5.54E-08 | 0.509934373 |
| 2 | rs6739453 | 9  | rs10975412 | 5.40E-08 | NA          |
| 2 | rs6744746 | 8  | rs3019350  | 8.19E-09 | 0.598497458 |
| 2 | rs6745242 | 18 | rs2847410  | 1.12E-07 | 0.614330946 |
| 2 | rs6753459 | 7  | rs2190924  | 1.17E-07 | 0.842974458 |
| 2 | rs6761398 | 5  | rs10074987 | 1.04E-08 | 0.897859199 |
| 2 | rs6761398 | 5  | rs12656759 | 3.89E-08 | 0.859693512 |
| 2 | rs6761398 | 5  | rs3763116  | 2.18E-08 | 0.879515193 |
| 2 | rs6761398 | 5  | rs440970   | 3.35E-08 | 0.846589057 |
| 2 | rs6761690 | 7  | rs38760    | 1.18E-08 | 0.433124569 |
| 1 | rs676913  | 12 | rs1558279  | 1.20E-07 | 0.063750868 |
| 3 | rs6777841 | 18 | rs11151039 | 4.66E-09 | 0.943424684 |
| 3 | rs6782743 | 18 | rs11151039 | 5.16E-09 | 0.939179589 |
| 3 | rs6789373 | 14 | rs17775406 | 4.01E-08 | 0.580741927 |
| 3 | rs6789577 | 5  | rs463247   | 4.33E-08 | 0.578654843 |
| 3 | rs6798573 | 9  | rs4877750  | 7.55E-10 | 0.51695497  |
| 3 | rs6798573 | 9  | rs7043458  | 1.94E-08 | 0.609978645 |
| 3 | rs6799005 | 5  | rs12656577 | 7.65E-08 | 0.727405618 |
| 4 | rs6818363 | 11 | rs534916   | 1.83E-07 | 0.511382291 |
| 4 | rs6818479 | 11 | rs10837968 | 6.07E-08 | 0.315774792 |
| 4 | rs6856615 | 10 | rs12221466 | 3.59E-08 | 0.361484799 |
| 5 | rs6874766 | 11 | rs1559759  | 1.98E-08 | 0.141712849 |
| 5 | rs6875372 | 19 | rs8104048  | 4.34E-08 | 0.314835122 |
| 6 | rs6916292 | 6  | rs9385677  | 4.03E-08 | NA          |
| 6 | rs6934395 | 13 | rs2186032  | 9.18E-09 | 0.086676922 |
| 6 | rs6939344 | 9  | rs3780439  | 2.92E-08 | 0.507192696 |
| 2 | rs694697  | 8  | rs4872508  | 1.15E-08 | 0.900011613 |
| 7 | rs6956440 | 11 | rs3781695  | 1.18E-07 | 0.250787085 |
| 7 | rs6960891 | 9  | rs10491778 | 8.62E-08 | 0.537498962 |
| 7 | rs6960891 | 9  | rs11791347 | 5.50E-08 | 0.558522489 |
| 2 | rs698853  | 2  | rs7596078  | 4.98E-08 | NA          |
| 8 | rs7006032 | 9  | rs11792080 | 5.76E-08 | 0.941062887 |
| 8 | rs7017184 | 11 | rs7105348  | 3.32E-08 | 0.40852989  |
| 9 | rs7029466 | 12 | rs10506322 | 6.43E-08 | 0.956743523 |
| 9 | rs7029466 | 12 | rs182714   | 6.66E-08 | 0.883995411 |
| 9 | rs7029466 | 12 | rs2254639  | 3.66E-08 | 0.776117853 |
| 9 | rs7029466 | 12 | rs2366134  | 7.84E-08 | 0.93345592  |
| 9 | rs7029466 | 12 | rs2699927  | 7.14E-08 | 0.883995411 |
| 9 | rs7031588 | 10 | rs550165   | 1.42E-06 | 0.335640468 |
| 2 | rs703277  | 2  | rs817085   | 3.50E-08 | 0.399713261 |

|    |           |    |            |          |             |
|----|-----------|----|------------|----------|-------------|
| 9  | rs7040144 | 16 | rs8045545  | 6.58E-08 | 0.7107616   |
| 9  | rs7042203 | 20 | rs2424490  | 2.32E-07 | 0.01813362  |
| 9  | rs7042203 | 20 | rs2746617  | 2.02E-07 | NA          |
| 6  | rs706915  | 7  | rs10238916 | 3.72E-08 | NA          |
| 6  | rs706915  | 7  | rs4723631  | 8.57E-08 | NA          |
| 1  | rs708088  | 6  | rs6917194  | 2.73E-09 | 0.212308148 |
| 10 | rs7084681 | 13 | rs4941897  | 6.29E-08 | 0.292775045 |
| 10 | rs7085082 | 16 | rs13330883 | 3.29E-08 | 0.099827266 |
| 10 | rs7095012 | 13 | rs1374483  | 5.36E-08 | 0.638099156 |
| 10 | rs7095012 | 13 | rs9569702  | 7.05E-08 | NA          |
| 10 | rs7096096 | 13 | rs2763901  | 1.40E-08 | 0.994690338 |
| 10 | rs7096494 | 14 | rs6576110  | 7.14E-08 | 0.539637453 |
| 11 | rs7130632 | 18 | rs1545723  | 3.04E-08 | 0.545920381 |
| 12 | rs7131776 | 17 | rs2289607  | 1.31E-07 | 0.798024485 |
| 1  | rs714625  | 11 | rs17509332 | 6.48E-08 | 0.402287016 |
| 15 | rs7175823 | 15 | rs17271669 | 5.29E-08 | 0.316063303 |
| 5  | rs718410  | 5  | rs2246477  | 9.87E-08 | 0.470280765 |
| 3  | rs718634  | 7  | rs286551   | 5.54E-08 | 0.361571338 |
| 2  | rs721301  | 6  | rs6908539  | 3.25E-08 | 0.09506579  |
| 12 | rs7311488 | 13 | rs1974255  | 8.57E-07 | 0.263870975 |
| 3  | rs7372391 | 9  | rs2226014  | 7.27E-09 | 0.185248585 |
| 3  | rs7372391 | 9  | rs4741294  | 5.60E-09 | 0.139394139 |
| 6  | rs7449629 | 9  | rs10980836 | 3.80E-08 | 0.682965781 |
| 1  | rs7527300 | 3  | rs747030   | 5.30E-08 | NA          |
| 1  | rs7531276 | 11 | rs11229246 | 9.35E-09 | 0.686499886 |
| 1  | rs7543674 | 10 | rs10828610 | 4.21E-08 | 0.811760227 |
| 1  | rs7544694 | 11 | rs10893354 | 6.02E-08 | 0.987124203 |
| 1  | rs7545402 | 9  | rs10978600 | 1.67E-08 | 0.243072913 |
| 1  | rs7545402 | 9  | rs1491103  | 1.55E-08 | 0.243072913 |
| 1  | rs7545402 | 9  | rs1491106  | 7.80E-09 | NA          |
| 7  | rs754553  | 22 | rs3788477  | 2.94E-08 | 0.475211959 |
| 1  | rs7549968 | 3  | rs9830439  | 1.83E-07 | 0.320808939 |
| 1  | rs7556581 | 6  | rs9294265  | 6.08E-08 | 0.322554467 |
| 1  | rs7556581 | 6  | rs9449554  | 6.33E-08 | 0.403405182 |
| 2  | rs7573259 | 5  | rs1015586  | 4.39E-09 | 0.516183886 |
| 2  | rs7575610 | 7  | rs4717400  | 1.10E-07 | 0.791784359 |
| 2  | rs7590873 | 7  | rs1559012  | 6.68E-08 | 0.518803094 |
| 2  | rs7608256 | 5  | rs1015586  | 2.14E-09 | 0.479737404 |
| 21 | rs762391  | 22 | rs9614208  | 4.35E-08 | 0.677878574 |
| 3  | rs7626036 | 3  | rs1386290  | 1.00E-07 | 0.886848078 |
| 3  | rs7626036 | 3  | rs6797943  | 1.15E-07 | 0.941290888 |
| 3  | rs7627715 | 7  | rs11772246 | 2.60E-07 | 0.550197654 |
| 3  | rs7627715 | 7  | rs844772   | 3.08E-08 | 0.866395491 |
| 3  | rs7631974 | 12 | rs10876321 | 1.90E-08 | 0.150576494 |

|    |           |    |            |          |             |
|----|-----------|----|------------|----------|-------------|
| 3  | rs7631974 | 12 | rs1488697  | 3.52E-08 | 0.121357202 |
| 3  | rs7631974 | 12 | rs1814640  | 1.83E-08 | 0.116267973 |
| 3  | rs7631974 | 12 | rs936955   | 2.75E-08 | 0.135040969 |
| 3  | rs7631974 | 12 | rs936956   | 1.49E-08 | 0.14026288  |
| 2  | rs763713  | 7  | rs7793374  | 2.55E-09 | 0.994967409 |
| 3  | rs7650123 | 12 | rs10876321 | 1.35E-08 | 0.138545981 |
| 3  | rs7650123 | 12 | rs1488697  | 2.52E-08 | 0.11145477  |
| 3  | rs7650123 | 12 | rs1814640  | 2.17E-08 | 0.106596566 |
| 3  | rs7650123 | 12 | rs936955   | 2.31E-08 | 0.124311363 |
| 3  | rs7650123 | 12 | rs936956   | 1.77E-08 | 0.129122958 |
| 4  | rs7683781 | 6  | rs4560641  | 1.05E-08 | 0.148418076 |
| 4  | rs7687935 | 14 | rs10131637 | 1.33E-08 | 0.045228642 |
| 4  | rs7688514 | 6  | rs2235989  | 2.73E-08 | 0.381626963 |
| 4  | rs7696645 | 14 | rs10131637 | 1.13E-08 | 0.04302594  |
| 4  | rs7697633 | 10 | rs12248921 | 3.08E-08 | 0.556569084 |
| 5  | rs7710595 | 10 | rs17819557 | 4.86E-08 | NA          |
| 5  | rs7710595 | 10 | rs4275540  | 5.69E-08 | NA          |
| 5  | rs7710595 | 10 | rs7916063  | 3.31E-08 | NA          |
| 5  | rs7714596 | 11 | rs1488876  | 5.31E-08 | 0.111742775 |
| 5  | rs7718186 | 6  | rs12180804 | 2.45E-08 | 0.893801865 |
| 5  | rs7718186 | 6  | rs614572   | 5.10E-08 | 0.853989581 |
| 5  | rs7718186 | 6  | rs6458214  | 1.85E-08 | 0.884403359 |
| 5  | rs7718186 | 6  | rs6458215  | 1.40E-08 | 0.912379125 |
| 5  | rs7718186 | 6  | rs647876   | 2.15E-08 | 0.826581687 |
| 5  | rs7718186 | 6  | rs9369270  | 9.02E-08 | 0.826581687 |
| 5  | rs7718617 | 11 | rs10834346 | 2.69E-07 | 0.880720205 |
| 5  | rs7732832 | 14 | rs17254989 | 8.16E-08 | 0.893316917 |
| 5  | rs7732832 | 14 | rs17833440 | 1.30E-08 | 0.703604188 |
| 6  | rs7755513 | 11 | rs2155388  | 6.39E-09 | 0.919262868 |
| 6  | rs7755513 | 11 | rs2849222  | 1.09E-08 | 0.76728428  |
| 6  | rs7772252 | 17 | rs854666   | 2.42E-08 | 0.110060143 |
| 7  | rs7788425 | 8  | rs11780203 | 1.03E-07 | 0.673983331 |
| 2  | rs779917  | 18 | rs658756   | 1.31E-07 | 0.684099404 |
| 7  | rs7808401 | 9  | rs10491778 | 8.23E-08 | 0.595536194 |
| 7  | rs7808401 | 9  | rs11791347 | 6.01E-08 | 0.617719389 |
| 8  | rs7821093 | 18 | rs17436811 | 7.02E-09 | 0.506406534 |
| 8  | rs7836186 | 17 | rs1989858  | 1.11E-08 | 0.891630626 |
| 9  | rs7853909 | 21 | rs2833679  | 1.33E-08 | 0.710697026 |
| 9  | rs7861593 | 14 | rs12885683 | 1.19E-07 | 0.124473529 |
| 10 | rs7893529 | 18 | rs896057   | 3.24E-08 | 0.979086758 |
| 10 | rs7896275 | 20 | rs6039354  | 1.54E-07 | 0.275320624 |
| 10 | rs7917036 | 21 | rs2837652  | 1.88E-08 | 0.777380539 |
| 11 | rs7929962 | 14 | rs4904477  | 8.26E-10 | 0.924154022 |
| 11 | rs7938012 | 12 | rs11609114 | 6.10E-08 | 0.42769829  |

|    |           |    |            |          |             |
|----|-----------|----|------------|----------|-------------|
| 11 | rs7938012 | 12 | rs3815670  | 2.03E-08 | 0.339039795 |
| 12 | rs7953801 | 15 | rs1458253  | 8.68E-08 | 0.618328287 |
| 12 | rs7971375 | 15 | rs2439398  | 9.00E-09 | 0.667329246 |
| 13 | rs7999348 | 15 | rs6494519  | 1.36E-08 | 0.241958202 |
| 14 | rs8015726 | 15 | rs16949774 | 1.80E-08 | 0.061756639 |
| 16 | rs8054039 | 17 | rs7207501  | 1.15E-07 | 0.367731016 |
| 8  | rs819188  | 18 | rs11151935 | 1.82E-08 | 0.158842814 |
| 2  | rs829624  | 5  | rs1023681  | 4.19E-08 | 0.287901783 |
| 2  | rs829640  | 5  | rs1023681  | 4.73E-08 | 0.068517065 |
| 2  | rs829652  | 5  | rs1023681  | 3.28E-08 | NA          |
| 2  | rs829692  | 5  | rs1023681  | 8.72E-08 | 0.082616983 |
| 1  | rs841839  | 12 | rs1006705  | 9.54E-08 | 0.577246416 |
| 6  | rs845652  | 10 | rs11245202 | 6.83E-09 | 0.467211787 |
| 5  | rs845740  | 11 | rs10892497 | 4.48E-08 | 0.384213135 |
| 5  | rs845740  | 11 | rs11217583 | 7.39E-08 | 0.182666156 |
| 5  | rs845740  | 11 | rs11217584 | 5.52E-08 | 0.380841291 |
| 6  | rs845883  | 13 | rs1340561  | 8.23E-08 | 0.75738722  |
| 6  | rs845885  | 13 | rs1340561  | 8.20E-08 | 0.984765234 |
| 3  | rs874968  | 6  | rs11156113 | 4.33E-08 | 0.87291016  |
| 8  | rs893464  | 8  | rs10504927 | 3.38E-08 | 0.883625377 |
| 8  | rs893464  | 8  | rs16915713 | 2.62E-08 | 0.875305132 |
| 8  | rs893464  | 8  | rs2197673  | 7.02E-08 | 0.894450061 |
| 11 | rs897355  | 20 | rs16999397 | 1.41E-08 | 0.964365445 |
| 2  | rs898935  | 5  | rs7724830  | 2.84E-08 | 0.888248584 |
| 2  | rs907135  | 5  | rs10074987 | 2.56E-08 | 0.74055318  |
| 12 | rs918107  | 13 | rs1974255  | 4.01E-07 | 0.217510457 |
| 5  | rs919336  | 12 | rs1566929  | 1.00E-08 | 0.370427208 |
| 1  | rs927512  | 8  | rs6558653  | 5.81E-09 | 0.554775797 |
| 9  | rs927890  | 22 | rs429942   | 2.18E-08 | 0.362503786 |
| 2  | rs9287609 | 7  | rs1559012  | 9.71E-08 | 0.492973944 |
| 3  | rs9311789 | 19 | rs3816963  | 2.54E-08 | 0.805792011 |
| 13 | rs9316293 | 18 | rs1662298  | 2.55E-08 | 0.535901138 |
| 6  | rs9320173 | 13 | rs10459348 | 2.52E-09 | NA          |
| 6  | rs9320173 | 13 | rs1932913  | 2.64E-09 | 0.305005906 |
| 6  | rs9328496 | 13 | rs473598   | 6.75E-08 | 0.611996952 |
| 2  | rs935170  | 5  | rs10071163 | 2.28E-09 | 0.063847752 |
| 6  | rs9364847 | 9  | rs10980836 | 6.01E-08 | 0.632057235 |
| 6  | rs9385677 | 6  | rs6916292  | 4.03E-08 | NA          |
| 7  | rs941368  | 11 | rs3781695  | 9.22E-08 | 0.223343981 |
| 1  | rs942904  | 10 | rs7910788  | 7.63E-08 | 0.845914944 |
| 13 | rs943001  | 16 | rs1381452  | 2.57E-08 | 0.999105742 |
| 1  | rs947377  | 1  | rs6669318  | 4.20E-05 | 0.750131407 |
| 6  | rs9475663 | 11 | rs1285318  | 3.10E-08 | 0.878643897 |
| 6  | rs9475663 | 11 | rs592545   | 2.37E-08 | 0.910757531 |

|    |           |    |            |          |             |
|----|-----------|----|------------|----------|-------------|
| 6  | rs9480682 | 13 | rs10459348 | 2.73E-09 | NA          |
| 6  | rs9480682 | 13 | rs1932913  | 3.28E-09 | 0.487118562 |
| 6  | rs9486383 | 13 | rs10459348 | 4.12E-09 | NA          |
| 6  | rs9486383 | 13 | rs1932913  | 4.31E-09 | 0.304350406 |
| 6  | rs9498266 | 7  | rs10486524 | 4.76E-08 | 0.539686078 |
| 13 | rs9554573 | 15 | rs6494519  | 1.53E-08 | 0.246541895 |
| 2  | rs9653477 | 18 | rs2156025  | 4.17E-08 | 0.825020713 |
| 9  | rs971834  | 15 | rs7176387  | 1.30E-07 | 0.241633095 |
| 11 | rs9787877 | 14 | rs4904477  | 2.54E-09 | 0.900725715 |
| 7  | rs9792042 | 15 | rs4775229  | 2.94E-07 | 0.539430127 |
| 2  | rs983267  | 7  | rs1559012  | 4.55E-08 | 0.566476142 |
| 3  | rs9834182 | 12 | rs10876321 | 2.11E-08 | 0.269978683 |
| 3  | rs9834182 | 12 | rs1814640  | 2.39E-08 | 0.217700763 |
| 3  | rs9834182 | 12 | rs936955   | 2.57E-08 | 0.248354313 |
| 3  | rs9834182 | 12 | rs936956   | 1.94E-08 | 0.254899572 |
| 3  | rs9850713 | 12 | rs10876321 | 2.22E-08 | 0.18462372  |
| 3  | rs9850713 | 12 | rs936955   | 3.18E-08 | 0.166655265 |
| 3  | rs9850713 | 12 | rs936956   | 2.04E-08 | 0.172412921 |
| 3  | rs9851626 | 6  | rs1078602  | 6.38E-08 | NA          |
| 3  | rs9855931 | 12 | rs10876321 | 2.88E-08 | 0.189539135 |
| 3  | rs9855931 | 12 | rs1488697  | 4.17E-08 | 0.154039451 |
| 3  | rs9855931 | 12 | rs1814640  | 3.86E-08 | 0.14798138  |
| 3  | rs9855931 | 12 | rs936955   | 1.76E-08 | 0.170696173 |
| 3  | rs9855931 | 12 | rs936956   | 3.16E-08 | 0.176554988 |
| 3  | rs9870018 | 6  | rs2636122  | 5.39E-08 | 0.108827577 |
| 3  | rs9871875 | 12 | rs10876321 | 2.26E-08 | NA          |
| 3  | rs9871875 | 12 | rs1814640  | 3.04E-08 | NA          |
| 3  | rs9871875 | 12 | rs936955   | 1.77E-08 | NA          |
| 3  | rs9871875 | 12 | rs936956   | 2.49E-08 | NA          |
| 3  | rs9872159 | 13 | rs4771629  | 2.40E-08 | 0.141858656 |
| 4  | rs9884525 | 13 | rs9521628  | 1.79E-07 | NA          |
| 10 | rs9919410 | 20 | rs6040171  | 1.00E-08 | 0.695368402 |
| 7  | rs994395  | 8  | rs10095813 | 1.93E-07 | 0.952148627 |
| 4  | rs998817  | 6  | rs9357223  | 8.68E-09 | 0.807681497 |
| 4  | rs9991718 | 21 | rs2096860  | 1.39E-07 | 0.03435235  |
